# Supplementary material for: Information-rich high-throughput cellular assays using acoustic mist ionisation mass spectrometry
Source: Royal Society of Chemistry journal article supplement (doi:10.1039/d0an01519a), 2020-10-23
Supplement: d0an01519a1.xlsx [file d0an01519a1.xlsx]

## Sheet: info
MCF7 data acquired in negative ion mode over 3.4 min, 0.53 s per sample
GD Expressionist settings:
1/ import raw data and remove empty scans
2/ calculate the geometric mean of remaining scans (baseline set to 1) - see tab 'MCF7 spectrum'
3/ Remove all peaks with signal:noise ratio below 5
391 peaks retained - see tab 'MCF7 peaks above 5to1'
13C (and 37Cl in neg ion) peaks removed (139 in total)
4 peaks related to internal standards
248 remaining features not easily attributable to stable isotopes or adducts
87 of these features annotated using HMDB/LipidMAPS based on +/-15 ppm and isotope pattern
Only the most common and known abundant cellular building blocks, metabolites and phospholipids annotated
Remaining 161 features unassigned or assigned as a mixture of lipid species

## Sheet: MCF7 spectrum
m/z	Intensity (a.u.)
99.8403	1.16626
99.8423	1.10272
99.8444	1.12996
99.8464	1.15201
99.8485	1.20236
99.8505	1.24821
99.8525	1.19475
99.8546	1.21945
99.8566	1.24461
99.8587	1.23319
99.8607	1.17976
99.8628	1.17857
99.8648	1.24026
99.8669	1.22852
99.8689	1.193
99.871	1.22168
99.873	1.18922
99.8751	1.23029
99.8771	1.16106
99.8792	1.12874
99.8812	1.12931
99.8833	1.12212
99.8853	1.12819
99.8873	1.13626
99.8894	1.10547
99.8914	1.12142
99.8935	1.1585
99.8955	1.10419
99.8976	1.10691
99.8996	1.11689
99.9017	1.15977
99.9037	1.18498
99.9058	1.16324
99.9078	1.15022
99.9099	1.15428
99.9119	1.18998
99.9139	1.15485
99.916	1.11146
99.918	1.09449
99.9201	1.11228
99.9221	1.17577
99.9242	1.16637
99.9262	1.14286
99.9283	1.18844
99.9303	1.22
99.9324	1.16942
99.9344	1.15962
99.9365	1.17589
99.9385	1.19406
99.9406	1.21244
99.9426	1.15227
99.9447	1.19846
99.9467	1.18839
99.9488	1.14053
99.9508	1.18359
99.9528	1.15069
99.9549	1.15793
99.9569	1.19313
99.959	1.17061
99.961	1.08806
99.9631	1.12576
99.9651	1.19192
99.9672	1.18991
99.9692	1.10968
99.9713	1.13725
99.9733	1.18406
99.9754	1.18869
99.9774	1.20085
99.9795	1.16961
99.9815	1.13963
99.9836	1.14643
99.9856	1.15292
99.9877	1.18421
99.9897	1.16091
99.9917	1.19823
99.9938	1.18725
99.9959	1.16117
99.9979	1.14107
99.9999	1.15471
100.002	1.21419
100.004	1.21612
100.006	1.17381
100.008	1.14974
100.01	1.22349
100.012	1.20516
100.014	1.15772
100.016	1.18098
100.018	1.15305
100.02	1.22222
100.022	1.22232
100.025	1.18079
100.027	1.21873
100.029	1.22462
100.031	1.22625
100.033	1.24369
100.035	1.21375
100.037	1.16284
100.039	1.21355
100.041	1.20737
100.043	1.15309
100.045	1.17925
100.047	1.18473
100.049	1.16726
100.051	1.2402
100.053	1.20987
100.055	1.16673
100.057	1.21636
100.059	1.2036
100.061	1.23005
100.063	1.21443
100.066	1.25019
100.067	1.2295
100.07	1.13906
100.072	1.15836
100.074	1.14535
100.076	1.14879
100.078	1.18258
100.08	1.20867
100.082	1.21165
100.084	1.23512
100.086	1.23092
100.088	1.17118
100.09	1.21654
100.092	1.18836
100.094	1.12188
100.096	1.15178
100.098	1.18148
100.1	1.19422
100.102	1.19466
100.104	1.15442
100.106	1.22946
100.109	1.1244
100.111	1.17875
100.113	1.21117
100.115	1.20896
100.117	1.12167
100.119	1.13699
100.121	1.19222
100.123	1.16451
100.125	1.21282
100.127	1.21834
100.129	1.23318
100.131	1.20097
100.133	1.12307
100.135	1.10888
100.137	1.16943
100.139	1.17503
100.141	1.16726
100.143	1.17298
100.145	1.16337
100.147	1.21617
100.15	1.16008
100.152	1.17457
100.154	1.19161
100.156	1.23919
100.158	1.19625
100.16	1.17355
100.162	1.18857
100.164	1.15493
100.166	1.11612
100.168	1.15471
100.17	1.15128
100.172	1.1252
100.174	1.12485
100.176	1.1876
100.178	1.14995
100.18	1.16491
100.182	1.14532
100.184	1.11505
100.186	1.15342
100.188	1.22499
100.191	1.21758
100.192	1.14827
100.195	1.11363
100.197	1.14772
100.199	1.13608
100.201	1.15028
100.203	1.20424
100.205	1.20551
100.207	1.18914
100.209	1.26673
100.211	1.22931
100.213	1.18133
100.215	1.14609
100.217	1.13735
100.219	1.17011
100.221	1.16775
100.223	1.23448
100.225	1.21591
100.227	1.13009
100.229	1.19593
100.231	1.11991
100.234	1.14978
100.236	1.25956
100.238	1.27981
100.24	1.18931
100.242	1.27346
100.244	1.2555
100.246	1.21176
100.248	1.19562
100.25	1.18259
100.252	1.19051
100.254	1.22766
100.256	1.16984
100.258	1.19411
100.26	1.21279
100.262	1.18962
100.264	1.1591
100.266	1.1211
100.268	1.14721
100.27	1.20592
100.272	1.2382
100.275	1.21371
100.277	1.14781
100.279	1.22666
100.281	1.22506
100.283	1.19701
100.285	1.21386
100.287	1.19576
100.289	1.18572
100.291	1.19746
100.293	1.15156
100.295	1.15124
100.297	1.13744
100.299	1.21022
100.301	1.19577
100.303	1.15453
100.305	1.1736
100.307	1.1739
100.309	1.15591
100.311	1.23255
100.314	1.18624
100.316	1.2107
100.318	1.16277
100.32	1.16708
100.322	1.22676
100.324	1.18206
100.326	1.16546
100.328	1.20888
100.33	1.18654
100.332	1.2323
100.334	1.25628
100.336	1.19434
100.338	1.23828
100.34	1.26057
100.342	1.14915
100.344	1.16988
100.346	1.13881
100.348	1.14119
100.35	1.15962
100.353	1.19769
100.355	1.16453
100.357	1.16587
100.359	1.16604
100.361	1.20703
100.363	1.15286
100.365	1.14063
100.367	1.13587
100.369	1.2098
100.371	1.19728
100.373	1.15159
100.375	1.09404
100.377	1.16385
100.379	1.19219
100.381	1.17173
100.383	1.13894
100.385	1.15669
100.387	1.1151
100.389	1.18232
100.391	1.22966
100.394	1.21253
100.396	1.18759
100.398	1.19423
100.4	1.16319
100.402	1.12337
100.404	1.18791
100.406	1.15888
100.408	1.14793
100.41	1.17809
100.412	1.16607
100.414	1.16705
100.416	1.25594
100.418	1.22369
100.42	1.19787
100.422	1.14733
100.424	1.13891
100.426	1.17555
100.428	1.18832
100.43	1.19522
100.433	1.20725
100.435	1.24424
100.437	1.23585
100.439	1.16756
100.441	1.20881
100.443	1.26148
100.445	1.22581
100.447	1.16526
100.449	1.2645
100.451	1.19748
100.453	1.23324
100.455	1.20259
100.457	1.13928
100.459	1.17851
100.461	1.3042
100.463	1.25962
100.465	1.21259
100.467	1.15645
100.469	1.23265
100.472	1.19196
100.474	1.20937
100.476	1.25998
100.478	1.17849
100.48	1.19005
100.482	1.24117
100.484	1.26435
100.486	1.23735
100.488	1.24874
100.49	1.19285
100.492	1.20671
100.494	1.22456
100.496	1.18346
100.498	1.21791
100.5	1.24962
100.502	1.16592
100.504	1.19524
100.506	1.19946
100.508	1.17702
100.51	1.24211
100.513	1.25025
100.515	1.20825
100.517	1.1646
100.519	1.20124
100.521	1.21856
100.523	1.27181
100.525	1.22675
100.527	1.12917
100.529	1.18621
100.531	1.17572
100.533	1.17719
100.535	1.18819
100.537	1.17657
100.539	1.1958
100.541	1.1574
100.543	1.16037
100.545	1.19436
100.547	1.19595
100.549	1.17824
100.552	1.18874
100.554	1.20084
100.556	1.25687
100.558	1.26782
100.56	1.18319
100.562	1.17595
100.564	1.17638
100.566	1.17618
100.568	1.20519
100.57	1.18194
100.572	1.1332
100.574	1.21451
100.576	1.22681
100.578	1.17855
100.58	1.12821
100.582	1.18236
100.585	1.19331
100.587	1.17701
100.589	1.15846
100.591	1.12088
100.593	1.15465
100.595	1.11095
100.597	1.15627
100.599	1.16833
100.601	1.14443
100.603	1.23046
100.605	1.21673
100.607	1.17686
100.609	1.15963
100.611	1.13806
100.613	1.1436
100.615	1.20618
100.617	1.18482
100.619	1.15154
100.621	1.14718
100.624	1.19104
100.626	1.17947
100.628	1.1677
100.63	1.13873
100.632	1.16461
100.634	1.15399
100.636	1.23134
100.638	1.20329
100.64	1.18638
100.642	1.20647
100.644	1.19724
100.646	1.16255
100.648	1.21201
100.65	1.18945
100.652	1.20278
100.654	1.23882
100.656	1.215
100.658	1.1874
100.66	1.18696
100.662	1.17573
100.665	1.2321
100.667	1.22249
100.669	1.21135
100.671	1.239
100.673	1.17246
100.675	1.22463
100.677	1.26451
100.679	1.19921
100.681	1.15517
100.683	1.16604
100.685	1.23242
100.687	1.2218
100.689	1.2025
100.691	1.12986
100.693	1.1757
100.695	1.19863
100.698	1.22443
100.7	1.19771
100.702	1.24191
100.704	1.20353
100.706	1.21147
100.708	1.22936
100.71	1.25182
100.712	1.20694
100.714	1.18725
100.716	1.1669
100.718	1.18732
100.72	1.18092
100.722	1.23803
100.724	1.18276
100.726	1.20877
100.728	1.19411
100.73	1.24128
100.732	1.17202
100.734	1.15654
100.737	1.18058
100.739	1.21168
100.741	1.16235
100.743	1.17942
100.745	1.22866
100.747	1.20726
100.749	1.19074
100.751	1.15965
100.753	1.17908
100.755	1.17464
100.757	1.16952
100.759	1.17434
100.761	1.15362
100.763	1.12197
100.765	1.12927
100.767	1.16873
100.769	1.18019
100.771	1.25103
100.773	1.19107
100.776	1.16018
100.778	1.14597
100.78	1.10883
100.782	1.14986
100.784	1.1829
100.786	1.10502
100.788	1.13024
100.79	1.24099
100.792	1.18361
100.794	1.25666
100.796	1.24058
100.798	1.1612
100.8	1.14651
100.802	1.20559
100.804	1.15463
100.806	1.18366
100.808	1.20919
100.811	1.21631
100.813	1.15553
100.815	1.12935
100.817	1.16803
100.819	1.23321
100.821	1.17562
100.823	1.12435
100.825	1.24249
100.827	1.24281
100.829	1.204
100.831	1.16605
100.833	1.16941
100.835	1.23097
100.837	1.22145
100.839	1.14917
100.841	1.21594
100.843	1.25134
100.846	1.27352
100.847	1.22413
100.85	1.23353
100.852	1.28645
100.854	1.20798
100.856	1.22701
100.858	1.24983
100.86	1.20374
100.862	1.19052
100.864	1.20263
100.866	1.20944
100.868	1.19354
100.87	1.23308
100.872	1.16707
100.874	1.28745
100.876	1.27587
100.878	1.26311
100.88	1.29164
100.882	1.26705
100.885	1.23762
100.887	1.26371
100.889	1.25649
100.891	1.27561
100.893	1.23885
100.895	1.21532
100.897	1.23966
100.899	1.28446
100.901	1.24729
100.903	1.16907
100.905	1.1366
100.907	1.24847
100.909	1.18148
100.911	1.2193
100.913	1.21592
100.915	1.15958
100.918	1.23695
100.919	1.25413
100.922	1.20447
100.924	1.26883
100.926	1.22865
100.928	1.22123
100.93	1.17165
100.932	1.19208
100.934	1.17013
100.936	1.17411
100.938	1.15661
100.94	1.15231
100.942	1.22444
100.944	1.20146
100.946	1.20723
100.948	1.21388
100.95	1.20293
100.952	1.14507
100.954	1.16603
100.957	1.1631
100.959	1.15102
100.961	1.14126
100.963	1.19393
100.965	1.19782
100.967	1.20163
100.969	1.19387
100.971	1.20802
100.973	1.2375
100.975	1.13238
100.977	1.10167
100.979	1.21177
100.981	1.1914
100.983	1.16163
100.985	1.20304
100.987	1.19346
100.99	1.19728
100.992	1.17766
100.994	1.16059
100.996	1.12826
100.998	1.1702
101	1.18371
101.002	1.20105
101.004	1.18532
101.006	1.13657
101.008	1.12862
101.01	1.16425
101.012	1.18034
101.014	1.18094
101.016	1.16488
101.018	1.15437
101.02	1.16995
101.022	1.15143
101.025	1.16154
101.026	1.19198
101.029	1.16559
101.031	1.18535
101.033	1.17176
101.035	1.09956
101.037	1.13279
101.039	1.193
101.041	1.18054
101.043	1.17796
101.045	1.17984
101.047	1.20643
101.049	1.2052
101.051	1.25687
101.053	1.22152
101.055	1.20335
101.057	1.27386
101.059	1.33262
101.061	1.27221
101.064	1.2167
101.066	1.24645
101.068	1.30409
101.07	1.30489
101.072	1.27986
101.074	1.34102
101.076	1.2375
101.078	1.19011
101.08	1.23961
101.082	1.24852
101.084	1.20897
101.086	1.2068
101.088	1.25761
101.09	1.28873
101.092	1.25253
101.094	1.24837
101.097	1.25051
101.099	1.16599
101.101	1.234
101.103	1.26448
101.105	1.25527
101.107	1.21348
101.109	1.20279
101.111	1.17321
101.113	1.19318
101.115	1.15449
101.117	1.21637
101.119	1.22822
101.121	1.17291
101.123	1.13914
101.125	1.22113
101.127	1.24703
101.129	1.22469
101.132	1.16985
101.134	1.158
101.136	1.28069
101.138	1.25799
101.14	1.18861
101.142	1.20202
101.144	1.17508
101.146	1.22152
101.148	1.23375
101.15	1.19283
101.152	1.19134
101.154	1.19744
101.156	1.2048
101.158	1.18992
101.16	1.21128
101.162	1.23571
101.165	1.22345
101.166	1.21626
101.169	1.17667
101.171	1.13452
101.173	1.14704
101.175	1.15071
101.177	1.16826
101.179	1.13947
101.181	1.22287
101.183	1.19321
101.185	1.17419
101.187	1.15362
101.189	1.14305
101.191	1.16183
101.193	1.17399
101.195	1.17619
101.197	1.15733
101.2	1.18869
101.202	1.19859
101.204	1.16432
101.206	1.18979
101.208	1.21003
101.21	1.15598
101.212	1.19318
101.214	1.16894
101.216	1.18494
101.218	1.13873
101.22	1.14994
101.222	1.16889
101.224	1.20589
101.226	1.2658
101.228	1.29419
101.23	1.23725
101.233	1.13854
101.234	1.16162
101.237	1.15262
101.239	1.14557
101.241	1.18747
101.243	1.15523
101.245	1.14944
101.247	1.15535
101.249	1.18689
101.251	1.17632
101.253	1.17403
101.255	1.16079
101.257	1.20316
101.259	1.26751
101.261	1.19951
101.263	1.21399
101.265	1.21088
101.267	1.1875
101.27	1.17205
101.272	1.20507
101.274	1.26806
101.276	1.23354
101.278	1.23005
101.28	1.27485
101.282	1.21158
101.284	1.21603
101.286	1.27988
101.288	1.28933
101.29	1.28344
101.292	1.20423
101.294	1.2497
101.296	1.26324
101.298	1.30412
101.3	1.28002
101.302	1.2973
101.305	1.31697
101.307	1.24169
101.309	1.2789
101.311	1.26483
101.313	1.23835
101.315	1.25651
101.317	1.22615
101.319	1.20864
101.321	1.25819
101.323	1.22929
101.325	1.20574
101.327	1.25429
101.329	1.24141
101.331	1.2606
101.334	1.26405
101.335	1.28166
101.338	1.29052
101.34	1.24853
101.342	1.14141
101.344	1.1974
101.346	1.24756
101.348	1.22979
101.35	1.20491
101.352	1.20871
101.354	1.21452
101.356	1.25882
101.358	1.16061
101.36	1.16226
101.362	1.19969
101.364	1.18363
101.367	1.16045
101.368	1.19102
101.371	1.21124
101.373	1.1986
101.375	1.19501
101.377	1.13494
101.379	1.14741
101.381	1.26773
101.383	1.22731
101.385	1.1833
101.387	1.16898
101.389	1.17225
101.391	1.19594
101.393	1.18247
101.395	1.09969
101.397	1.16926
101.399	1.10639
101.401	1.13614
101.404	1.22415
101.406	1.17972
101.408	1.17997
101.41	1.18077
101.412	1.14675
101.414	1.14438
101.416	1.15584
101.418	1.19986
101.42	1.15271
101.422	1.14282
101.424	1.13016
101.426	1.1489
101.428	1.13238
101.43	1.1788
101.432	1.14476
101.434	1.16614
101.437	1.15833
101.439	1.17158
101.441	1.17499
101.443	1.11886
101.445	1.12193
101.447	1.16237
101.449	1.1542
101.451	1.14587
101.453	1.1749
101.455	1.1697
101.457	1.12523
101.459	1.14099
101.461	1.13784
101.463	1.12701
101.465	1.17056
101.468	1.14113
101.47	1.16174
101.472	1.27221
101.474	1.232
101.476	1.22058
101.478	1.14531
101.48	1.18896
101.482	1.23011
101.484	1.22896
101.486	1.24145
101.488	1.21297
101.49	1.1657
101.492	1.17043
101.494	1.18758
101.496	1.20514
101.499	1.1971
101.501	1.22787
101.503	1.28166
101.505	1.30105
101.507	1.24889
101.509	1.16564
101.511	1.22372
101.513	1.26154
101.515	1.18472
101.517	1.16736
101.519	1.21551
101.521	1.27991
101.523	1.27482
101.525	1.27311
101.527	1.18869
101.529	1.12803
101.531	1.14864
101.534	1.28271
101.536	1.20441
101.538	1.19374
101.54	1.16778
101.542	1.2307
101.544	1.19956
101.546	1.21082
101.548	1.18
101.55	1.24395
101.552	1.20161
101.554	1.14121
101.556	1.12343
101.558	1.13861
101.56	1.14271
101.562	1.14796
101.564	1.17283
101.567	1.17402
101.569	1.19379
101.571	1.21955
101.573	1.19434
101.575	1.245
101.577	1.20443
101.579	1.11236
101.581	1.20709
101.583	1.2283
101.585	1.15105
101.587	1.16357
101.589	1.16979
101.591	1.18361
101.593	1.15359
101.595	1.13379
101.597	1.16302
101.6	1.19458
101.602	1.18626
101.604	1.14077
101.606	1.14322
101.608	1.14779
101.61	1.1907
101.612	1.17577
101.614	1.20238
101.616	1.19559
101.618	1.172
101.62	1.18188
101.622	1.17523
101.624	1.14243
101.626	1.09566
101.629	1.13275
101.63	1.1687
101.633	1.15867
101.635	1.15646
101.637	1.12388
101.639	1.11553
101.641	1.19592
101.643	1.17883
101.645	1.19692
101.647	1.18381
101.649	1.17186
101.651	1.13229
101.653	1.1509
101.655	1.21284
101.657	1.20874
101.659	1.11499
101.662	1.09994
101.664	1.12864
101.666	1.17915
101.668	1.15672
101.67	1.14779
101.672	1.16395
101.674	1.15792
101.676	1.12174
101.678	1.17847
101.68	1.22066
101.682	1.199
101.684	1.19449
101.686	1.18031
101.688	1.19963
101.69	1.22512
101.692	1.19283
101.695	1.2228
101.697	1.23897
101.699	1.21545
101.701	1.17294
101.703	1.20042
101.705	1.17663
101.707	1.18802
101.709	1.18311
101.711	1.16115
101.713	1.16856
101.715	1.16855
101.717	1.1687
101.719	1.14767
101.721	1.18323
101.724	1.2171
101.725	1.28915
101.728	1.26155
101.73	1.15154
101.732	1.18369
101.734	1.21637
101.736	1.21594
101.738	1.20228
101.74	1.21953
101.742	1.19088
101.744	1.16806
101.746	1.17355
101.748	1.22342
101.75	1.19569
101.752	1.18746
101.754	1.22681
101.757	1.23021
101.759	1.19839
101.761	1.15394
101.763	1.13869
101.765	1.20396
101.767	1.20722
101.769	1.24445
101.771	1.22535
101.773	1.14458
101.775	1.14735
101.777	1.17738
101.779	1.1641
101.781	1.17693
101.783	1.22734
101.785	1.20763
101.787	1.18054
101.79	1.16537
101.792	1.1438
101.794	1.163
101.796	1.20853
101.798	1.25266
101.8	1.24715
101.802	1.22941
101.804	1.16636
101.806	1.13833
101.808	1.11799
101.81	1.11961
101.812	1.14669
101.814	1.14025
101.816	1.11681
101.819	1.1715
101.821	1.17352
101.823	1.19308
101.825	1.18093
101.827	1.19213
101.829	1.1815
101.831	1.18304
101.833	1.15801
101.835	1.16402
101.837	1.21749
101.839	1.24319
101.841	1.23198
101.843	1.16475
101.845	1.13617
101.847	1.15859
101.85	1.11899
101.852	1.141
101.854	1.14197
101.856	1.18512
101.858	1.18512
101.86	1.16825
101.862	1.15605
101.864	1.0986
101.866	1.13698
101.868	1.16714
101.87	1.16329
101.872	1.16026
101.874	1.16612
101.876	1.16283
101.878	1.16477
101.88	1.19748
101.883	1.15522
101.885	1.14958
101.887	1.2086
101.889	1.2108
101.891	1.22783
101.893	1.24762
101.895	1.15833
101.897	1.11943
101.899	1.1311
101.901	1.1598
101.903	1.19584
101.905	1.25176
101.907	1.20215
101.909	1.19366
101.912	1.17009
101.914	1.1313
101.916	1.13129
101.918	1.20332
101.92	1.17967
101.922	1.20134
101.924	1.15849
101.926	1.19889
101.928	1.24609
101.93	1.23229
101.932	1.2286
101.934	1.25549
101.936	1.24845
101.938	1.2257
101.941	1.14648
101.942	1.16754
101.945	1.21348
101.947	1.18799
101.949	1.21759
101.951	1.23387
101.953	1.18631
101.955	1.18185
101.957	1.17594
101.959	1.17491
101.961	1.1537
101.963	1.14985
101.965	1.13651
101.967	1.16449
101.969	1.17231
101.972	1.17138
101.974	1.1754
101.976	1.1411
101.978	1.1
101.98	1.20602
101.982	1.25557
101.984	1.22275
101.986	1.16038
101.988	1.18581
101.99	1.20768
101.992	1.18296
101.994	1.18071
101.996	1.18021
101.998	1.16491
102	1.18314
102.002	1.19297
102.005	1.21905
102.007	1.13561
102.009	1.20894
102.011	1.21803
102.013	1.15891
102.015	1.12955
102.017	1.17654
102.019	1.15168
102.021	1.22652
102.023	1.2171
102.025	1.14541
102.027	1.13672
102.029	1.14879
102.031	1.19452
102.034	1.14494
102.036	1.11998
102.038	1.12367
102.04	1.1596
102.042	1.20912
102.044	1.14949
102.046	1.16756
102.048	1.24141
102.05	1.41052
102.052	1.84381
102.054	2.24973
102.056	2.7245
102.058	2.04147
102.06	1.53167
102.062	1.2782
102.065	1.17389
102.067	1.20002
102.069	1.20497
102.071	1.20535
102.073	1.21414
102.075	1.21262
102.077	1.13203
102.079	1.14977
102.081	1.16942
102.083	1.1703
102.085	1.19069
102.087	1.1765
102.089	1.18312
102.091	1.17017
102.094	1.19423
102.096	1.2425
102.098	1.21316
102.1	1.15872
102.102	1.24012
102.104	1.23518
102.106	1.21909
102.108	1.1986
102.11	1.16427
102.112	1.16087
102.114	1.18331
102.116	1.1492
102.118	1.21573
102.12	1.15813
102.123	1.19193
102.125	1.19934
102.127	1.18399
102.129	1.22507
102.131	1.16038
102.133	1.20735
102.135	1.21849
102.137	1.19092
102.139	1.2012
102.141	1.19338
102.143	1.19352
102.145	1.19139
102.147	1.20006
102.149	1.18167
102.151	1.12115
102.153	1.21164
102.156	1.19869
102.158	1.14119
102.16	1.17498
102.162	1.18185
102.164	1.19725
102.166	1.25184
102.168	1.25868
102.17	1.17372
102.172	1.14883
102.174	1.18018
102.176	1.18441
102.178	1.19873
102.18	1.12793
102.183	1.14792
102.185	1.14539
102.187	1.14278
102.189	1.14773
102.191	1.15219
102.193	1.15268
102.195	1.16506
102.197	1.17237
102.199	1.12676
102.201	1.1996
102.203	1.19486
102.205	1.13592
102.207	1.15524
102.209	1.16403
102.212	1.12583
102.214	1.13639
102.216	1.12127
102.218	1.19511
102.22	1.1938
102.222	1.19081
102.224	1.19707
102.226	1.15069
102.228	1.1325
102.23	1.16277
102.232	1.20113
102.234	1.178
102.236	1.1732
102.238	1.14273
102.24	1.12317
102.243	1.12159
102.245	1.16061
102.247	1.13969
102.249	1.12037
102.251	1.17976
102.253	1.15758
102.255	1.11369
102.257	1.1664
102.259	1.13527
102.261	1.09054
102.263	1.12356
102.265	1.17852
102.267	1.18983
102.269	1.1806
102.272	1.17427
102.274	1.18093
102.276	1.14275
102.278	1.10011
102.28	1.09748
102.282	1.11849
102.284	1.09925
102.286	1.07603
102.288	1.11017
102.29	1.16301
102.292	1.14016
102.294	1.16227
102.296	1.13624
102.299	1.11494
102.301	1.14396
102.303	1.22021
102.305	1.23394
102.307	1.19461
102.309	1.14406
102.311	1.11476
102.313	1.12578
102.315	1.17316
102.317	1.15719
102.319	1.16999
102.321	1.13822
102.323	1.17474
102.325	1.14699
102.328	1.12035
102.33	1.17046
102.332	1.18858
102.334	1.13629
102.336	1.11477
102.338	1.11859
102.34	1.14222
102.342	1.1915
102.344	1.12735
102.346	1.2051
102.348	1.20842
102.35	1.16969
102.352	1.1948
102.354	1.18411
102.356	1.13296
102.359	1.1741
102.361	1.18325
102.363	1.18934
102.365	1.21896
102.367	1.14807
102.369	1.1819
102.371	1.17468
102.373	1.12303
102.375	1.11941
102.377	1.16109
102.379	1.12512
102.381	1.16858
102.383	1.15563
102.385	1.16583
102.388	1.1598
102.39	1.18596
102.392	1.17237
102.394	1.14853
102.396	1.20181
102.398	1.20315
102.4	1.1802
102.402	1.17885
102.404	1.11801
102.406	1.17532
102.408	1.18543
102.41	1.16539
102.412	1.18857
102.415	1.1677
102.417	1.16398
102.419	1.16114
102.421	1.14076
102.423	1.10326
102.425	1.13603
102.427	1.19842
102.429	1.17672
102.431	1.17965
102.433	1.14674
102.435	1.09811
102.437	1.12679
102.439	1.11445
102.442	1.12085
102.444	1.1326
102.446	1.14011
102.448	1.12511
102.45	1.10916
102.452	1.13382
102.454	1.12746
102.456	1.13296
102.458	1.13444
102.46	1.15019
102.462	1.14021
102.464	1.15161
102.466	1.16425
102.468	1.17417
102.471	1.1755
102.473	1.21181
102.475	1.15042
102.477	1.1423
102.479	1.18223
102.481	1.14396
102.483	1.15932
102.485	1.17397
102.487	1.15635
102.489	1.16681
102.491	1.14151
102.493	1.12637
102.495	1.11026
102.497	1.12234
102.499	1.12813
102.502	1.11273
102.504	1.16705
102.506	1.17893
102.508	1.16611
102.51	1.20951
102.512	1.14212
102.514	1.13578
102.516	1.15715
102.518	1.12099
102.52	1.13556
102.522	1.15221
102.524	1.12659
102.526	1.13764
102.528	1.17123
102.531	1.20185
102.533	1.16391
102.535	1.15831
102.537	1.18692
102.539	1.17558
102.541	1.17371
102.543	1.23793
102.545	1.19422
102.547	1.18044
102.549	1.17338
102.551	1.19722
102.553	1.19283
102.555	1.19869
102.558	1.19297
102.56	1.16673
102.562	1.16045
102.564	1.19131
102.566	1.18513
102.568	1.26236
102.57	1.26056
102.572	1.17003
102.574	1.20599
102.576	1.15706
102.578	1.15461
102.58	1.12881
102.582	1.1094
102.585	1.18252
102.587	1.16826
102.589	1.17991
102.591	1.18076
102.593	1.13417
102.595	1.13839
102.597	1.17444
102.599	1.14197
102.601	1.10411
102.603	1.20601
102.605	1.27574
102.607	1.24414
102.609	1.21846
102.612	1.17457
102.614	1.15103
102.616	1.19509
102.618	1.22987
102.62	1.24031
102.622	1.17769
102.624	1.16869
102.626	1.16639
102.628	1.139
102.63	1.15402
102.632	1.20353
102.634	1.21776
102.636	1.17535
102.638	1.14685
102.641	1.14794
102.643	1.11509
102.645	1.15191
102.647	1.16338
102.649	1.18398
102.651	1.14005
102.653	1.10629
102.655	1.15981
102.657	1.17159
102.659	1.13123
102.661	1.17434
102.663	1.17657
102.665	1.17364
102.668	1.1683
102.67	1.1322
102.672	1.13996
102.674	1.14433
102.676	1.20252
102.678	1.11279
102.68	1.17012
102.682	1.23667
102.684	1.19819
102.686	1.12779
102.688	1.15499
102.69	1.11298
102.692	1.10826
102.695	1.15964
102.697	1.26394
102.699	1.22109
102.701	1.15656
102.703	1.15674
102.705	1.14354
102.707	1.18319
102.709	1.22297
102.711	1.22283
102.713	1.21238
102.715	1.1175
102.717	1.1423
102.719	1.16811
102.722	1.16363
102.724	1.16085
102.726	1.1192
102.728	1.109
102.73	1.14235
102.732	1.20379
102.734	1.14824
102.736	1.11997
102.738	1.1947
102.74	1.15482
102.742	1.09745
102.744	1.17264
102.746	1.1859
102.749	1.19802
102.751	1.16639
102.753	1.1729
102.755	1.19258
102.757	1.16495
102.759	1.18795
102.761	1.20064
102.763	1.19583
102.765	1.18477
102.767	1.1746
102.769	1.21878
102.771	1.20276
102.773	1.15431
102.775	1.20879
102.778	1.17547
102.78	1.24562
102.782	1.25319
102.784	1.16165
102.786	1.20567
102.788	1.25817
102.79	1.20449
102.792	1.19467
102.794	1.19462
102.796	1.20754
102.798	1.15147
102.8	1.22874
102.802	1.25764
102.805	1.15876
102.807	1.17357
102.809	1.14468
102.811	1.17115
102.813	1.20913
102.815	1.14868
102.817	1.1503
102.819	1.17209
102.821	1.18994
102.823	1.15838
102.825	1.18012
102.827	1.1338
102.829	1.15579
102.832	1.17596
102.834	1.16072
102.836	1.21236
102.838	1.17244
102.84	1.15094
102.842	1.18247
102.844	1.19523
102.846	1.16816
102.848	1.1337
102.85	1.12682
102.852	1.11323
102.854	1.19444
102.856	1.28343
102.859	1.2071
102.861	1.13033
102.863	1.13153
102.865	1.08535
102.867	1.12771
102.869	1.16376
102.871	1.16171
102.873	1.16242
102.875	1.16
102.877	1.17335
102.879	1.16728
102.881	1.19479
102.883	1.20177
102.885	1.12065
102.888	1.13384
102.89	1.15904
102.892	1.15517
102.894	1.16446
102.896	1.16407
102.898	1.1518
102.9	1.15136
102.902	1.22332
102.904	1.18482
102.906	1.16207
102.908	1.15077
102.91	1.09946
102.912	1.11984
102.915	1.13457
102.917	1.10732
102.919	1.122
102.921	1.1878
102.923	1.15408
102.925	1.16281
102.927	1.15889
102.929	1.14033
102.931	1.10288
102.933	1.09597
102.935	1.10239
102.937	1.145
102.939	1.16651
102.942	1.15321
102.944	1.12701
102.946	1.11879
102.948	1.15107
102.95	1.12925
102.952	1.17153
102.954	1.19064
102.956	1.16567
102.958	1.13101
102.96	1.10795
102.962	1.16754
102.965	1.18043
102.966	1.15522
102.969	1.22762
102.971	1.18601
102.973	1.162
102.975	1.1765
102.977	1.1705
102.979	1.24457
102.981	1.26565
102.983	1.22387
102.985	1.21549
102.987	1.19644
102.989	1.22291
102.992	1.20701
102.994	1.17588
102.996	1.19442
102.998	1.20403
103	1.19039
103.002	1.1567
103.004	1.19677
103.006	1.223
103.008	1.22052
103.01	1.21244
103.012	1.1816
103.014	1.14854
103.016	1.15764
103.019	1.19264
103.021	1.16103
103.023	1.15731
103.025	1.21419
103.027	1.19842
103.029	1.17045
103.031	1.17368
103.033	1.18114
103.035	1.15447
103.037	1.16481
103.039	1.2288
103.041	1.21554
103.043	1.19734
103.046	1.1632
103.048	1.13197
103.05	1.15798
103.052	1.14861
103.054	1.17041
103.056	1.1377
103.058	1.1363
103.06	1.198
103.062	1.28614
103.064	1.22763
103.066	1.20471
103.068	1.2534
103.07	1.18114
103.073	1.19206
103.075	1.14107
103.077	1.17321
103.079	1.21959
103.081	1.16603
103.083	1.16474
103.085	1.21889
103.087	1.20469
103.089	1.17463
103.091	1.11309
103.093	1.0823
103.095	1.11385
103.097	1.16657
103.1	1.13473
103.102	1.10974
103.104	1.12796
103.106	1.18528
103.108	1.20978
103.11	1.15218
103.112	1.21008
103.114	1.20513
103.116	1.23315
103.118	1.22644
103.12	1.20089
103.123	1.12343
103.124	1.10689
103.127	1.16662
103.129	1.16736
103.131	1.15816
103.133	1.1501
103.135	1.13384
103.137	1.15751
103.139	1.16917
103.141	1.17829
103.143	1.13492
103.145	1.14621
103.147	1.16955
103.15	1.20165
103.152	1.16676
103.154	1.1523
103.156	1.1543
103.158	1.1105
103.16	1.13115
103.162	1.08939
103.164	1.07416
103.166	1.17106
103.168	1.25082
103.17	1.20412
103.172	1.14356
103.174	1.1525
103.177	1.12539
103.179	1.10092
103.181	1.12322
103.183	1.19472
103.185	1.18126
103.187	1.14814
103.189	1.17361
103.191	1.1683
103.193	1.22219
103.195	1.21182
103.197	1.16154
103.199	1.22319
103.201	1.22762
103.204	1.17155
103.206	1.12679
103.208	1.16669
103.21	1.1573
103.212	1.1113
103.214	1.12017
103.216	1.16515
103.218	1.1647
103.22	1.14487
103.222	1.16071
103.224	1.22865
103.227	1.19726
103.228	1.19243
103.231	1.18104
103.233	1.16424
103.235	1.16956
103.237	1.14198
103.239	1.19449
103.241	1.19859
103.243	1.18054
103.245	1.18405
103.247	1.15805
103.249	1.14561
103.251	1.16261
103.254	1.19697
103.256	1.22469
103.258	1.1991
103.26	1.16532
103.262	1.17333
103.264	1.14997
103.266	1.16704
103.268	1.09433
103.27	1.17501
103.272	1.25534
103.274	1.19613
103.276	1.1545
103.278	1.12435
103.281	1.10683
103.283	1.1421
103.285	1.21966
103.287	1.15287
103.289	1.13237
103.291	1.20904
103.293	1.12583
103.295	1.12767
103.297	1.12921
103.299	1.14828
103.301	1.18372
103.303	1.18535
103.305	1.17338
103.308	1.21953
103.31	1.13037
103.312	1.15144
103.314	1.19246
103.316	1.13632
103.318	1.13359
103.32	1.20368
103.322	1.19419
103.324	1.12791
103.326	1.15821
103.328	1.2289
103.331	1.14312
103.333	1.14585
103.335	1.18782
103.337	1.18841
103.339	1.1666
103.341	1.16891
103.343	1.1824
103.345	1.15588
103.347	1.14134
103.349	1.14357
103.351	1.14055
103.353	1.12716
103.356	1.07746
103.358	1.12469
103.36	1.17077
103.362	1.13822
103.364	1.15729
103.366	1.19565
103.368	1.12107
103.37	1.10542
103.372	1.17159
103.374	1.16105
103.376	1.15874
103.378	1.1738
103.38	1.1401
103.383	1.12554
103.385	1.18529
103.387	1.15989
103.389	1.15329
103.391	1.16405
103.393	1.12661
103.395	1.18783
103.397	1.1762
103.399	1.14017
103.401	1.1898
103.403	1.21246
103.406	1.1586
103.408	1.2127
103.41	1.14504
103.412	1.15715
103.414	1.18498
103.416	1.15682
103.418	1.14497
103.42	1.19675
103.422	1.22627
103.424	1.24646
103.426	1.19812
103.428	1.2295
103.43	1.16825
103.433	1.20611
103.435	1.2173
103.437	1.19419
103.439	1.16136
103.441	1.20423
103.443	1.13206
103.445	1.15031
103.447	1.17111
103.449	1.20886
103.451	1.19602
103.453	1.23809
103.456	1.21145
103.458	1.18552
103.46	1.21655
103.462	1.20764
103.464	1.19811
103.466	1.22124
103.468	1.21134
103.47	1.23737
103.472	1.28105
103.474	1.16213
103.476	1.16082
103.478	1.17482
103.481	1.15961
103.483	1.14261
103.485	1.14262
103.487	1.1994
103.489	1.20103
103.491	1.14219
103.493	1.15587
103.495	1.1406
103.497	1.15614
103.499	1.19669
103.501	1.15525
103.503	1.21252
103.505	1.17275
103.508	1.15711
103.51	1.18411
103.512	1.15703
103.514	1.14091
103.516	1.11168
103.518	1.15873
103.52	1.21426
103.522	1.19949
103.524	1.15878
103.526	1.10227
103.528	1.12748
103.531	1.14825
103.533	1.1982
103.535	1.21847
103.537	1.1331
103.539	1.15565
103.541	1.14608
103.543	1.13859
103.545	1.20033
103.547	1.22356
103.549	1.18819
103.551	1.19214
103.553	1.17477
103.555	1.14585
103.558	1.17049
103.56	1.20952
103.562	1.27129
103.564	1.20578
103.566	1.15919
103.568	1.12481
103.57	1.15824
103.572	1.16234
103.574	1.1635
103.576	1.19332
103.578	1.16105
103.581	1.16309
103.583	1.15898
103.585	1.10617
103.587	1.19477
103.589	1.13414
103.591	1.14914
103.593	1.19721
103.595	1.19421
103.597	1.162
103.599	1.16994
103.601	1.15657
103.603	1.16327
103.606	1.22455
103.608	1.17947
103.61	1.14733
103.612	1.11032
103.614	1.20164
103.616	1.22733
103.618	1.11099
103.62	1.13086
103.622	1.24612
103.624	1.22792
103.626	1.13566
103.628	1.19909
103.63	1.18116
103.633	1.20951
103.635	1.24504
103.637	1.22684
103.639	1.17052
103.641	1.14676
103.643	1.14698
103.645	1.19601
103.647	1.15435
103.649	1.17543
103.651	1.15295
103.653	1.11959
103.656	1.14766
103.658	1.13758
103.66	1.17814
103.662	1.24595
103.664	1.25195
103.666	1.17024
103.668	1.18549
103.67	1.24436
103.672	1.17227
103.674	1.17486
103.676	1.12933
103.678	1.13535
103.681	1.12898
103.683	1.1294
103.685	1.23365
103.687	1.2254
103.689	1.13524
103.691	1.1696
103.693	1.17903
103.695	1.13615
103.697	1.18318
103.699	1.14588
103.701	1.19651
103.704	1.20622
103.706	1.14374
103.708	1.15402
103.71	1.15967
103.712	1.16682
103.714	1.18701
103.716	1.19245
103.718	1.18271
103.72	1.13985
103.722	1.14678
103.724	1.13738
103.726	1.15222
103.728	1.17317
103.731	1.12493
103.733	1.16768
103.735	1.1636
103.737	1.12319
103.739	1.09311
103.741	1.19586
103.743	1.18145
103.745	1.24176
103.747	1.1789
103.749	1.13354
103.751	1.2237
103.754	1.22913
103.756	1.1869
103.758	1.21089
103.76	1.15412
103.762	1.14654
103.764	1.16253
103.766	1.1364
103.768	1.12112
103.77	1.11688
103.772	1.11457
103.774	1.16756
103.776	1.15248
103.779	1.17406
103.781	1.1905
103.783	1.19588
103.785	1.22832
103.787	1.19621
103.789	1.20573
103.791	1.26958
103.793	1.18546
103.795	1.20228
103.797	1.18615
103.799	1.20257
103.802	1.1481
103.804	1.11296
103.806	1.0943
103.808	1.13225
103.81	1.17187
103.812	1.21307
103.814	1.19917
103.816	1.1384
103.818	1.20555
103.82	1.27561
103.822	1.29026
103.825	1.21433
103.827	1.18819
103.829	1.23685
103.831	1.18702
103.833	1.22347
103.835	1.21404
103.837	1.16545
103.839	1.22123
103.841	1.26411
103.843	1.19531
103.845	1.1849
103.847	1.18688
103.85	1.23962
103.852	1.29814
103.854	1.23528
103.856	1.17702
103.858	1.22812
103.86	1.29248
103.862	1.37598
103.864	1.25009
103.866	1.19118
103.868	1.16558
103.87	1.11099
103.873	1.14116
103.875	1.19723
103.877	1.18104
103.879	1.22548
103.881	1.23073
103.883	1.23575
103.885	1.17929
103.887	1.20657
103.889	1.18499
103.891	1.22546
103.893	1.21721
103.895	1.1769
103.897	1.13989
103.9	1.18653
103.902	1.15656
103.904	1.20527
103.906	1.20074
103.908	1.14615
103.91	1.18437
103.912	1.2168
103.914	1.28288
103.916	1.17784
103.918	1.16461
103.921	1.23051
103.923	1.18022
103.925	1.09694
103.927	1.17052
103.929	1.17301
103.931	1.16646
103.933	1.18656
103.935	1.15793
103.937	1.1746
103.939	1.19395
103.941	1.17914
103.944	1.19668
103.946	1.20305
103.948	1.16038
103.95	1.13694
103.952	1.18123
103.954	1.17345
103.956	1.15792
103.958	1.10695
103.96	1.13105
103.962	1.16543
103.964	1.11226
103.966	1.16946
103.969	1.16911
103.971	1.12726
[truncated: 209,243+ more rows]

## Sheet: MCF7 peaks above 5to1
Measured m/z	ID	signal:noise	adduct	Theoretical m/z	Error ppm
124.007	Taurine	148.8	M-H	124.007	-4.12485
127.051	Pyroglutamine	12.5	M-H	127.051	-4.37547
128.035	Pyroglutamic acid	46.8	M-H	128.035	-2.30919
131.046	Asparagine	5.1	M-H	131.046	-0.073357
131.082	Ornithine	5.4	M-H	131.083	-2.84626
132.029	Aspartic acid	5.7	M-H	132.03	-5.61672
145.061	Glutamine	206.9	M-H	145.062	-3.52033
146.045	Glutamic acid	134.9	M-H	146.046	-4.31269
154.061	Histidine	9.1	M-H	154.062	-5.14725
173.104	Arginine	24.7	M-H	173.104	-3.75937
180.066	Tyrosine	6.8	M-H	180.067	-5.98031
214.048	Glycerophosphoethanolamine	251.8	M-H	214.049	-4.66677
218.101	pantothenic acid	5.8	M-H	218.103	-12.3898
255.232	Palmitic acid	10.3	M-H	255.233	-5.83108
281.248	Oleic acid	5.6	M-H	281.249	-2.024
283.264	Stearic acid	93.7	M-H	283.264	-0.180318
297.243	FA(oxo-18:0)	22.6	M-H	297.243	-1.02098
299.26	FA(hydroxy-18:0)	27.2	M-H	299.259	1.61025
306.076	Glutathione, reduced	915.8	M-H	306.077	-8.53291e-05
309.08	internal standard - GSH-13C2,15N	1429.5	M-H	309.08	0.231403
323.029	UMP	30.4	M-H	323.029	0.426214
328.059	Glutathione, reduced	194.4	M-2H+Na	328.058	2.11012
331.063	internal standard - GSH-13C2,15N	364.3	M-2H+Na	331.062	2.056
344.033	Glutathione, reduced	11.2	M-2H+K	344.032	0.348642
346.057	AMP	116.8	M-H	346.056	2.67525
347.037	internal standard - GSH-13C2,15N	22.5	M-2H+K	347.036	1.85036
362.051	GMP	6.1	M-H	362.051	1.00086
402.997	UDP	15.1	M-H	402.995	5.53299
426.024	ADP	59.6	M-H	426.022	4.64951
442.02	GDP	6.2	M-H	442.017	6.38731
450.265	LysoPE(16:1)	58.8	M-H	450.263	5.47867
452.28	LysoPE(16:0)	250.2	M-H	452.278	4.55286
465.307	cholesterol sulfate	210	M-H	465.304	5.5314
478.296	LysoPE(18:1)	192	M-H	478.294	5.18376
480.312	LysoPE(18:0)	280.6	M-H	480.31	5.572
500.282	LysoPE(20:4)	13.1	M-H	500.278	8.29091
505.992	ATP	10.4	M-H	505.988	6.45975
506.328	LysoPE(20:1)	9.9	M-H	506.325	6.40218
524.302	LysoPS(18:0)	5.9	M-H	524.299	4.66073
530.304	LysoPC(16:0)	6.7	M+Cl	530.302	3.12816
565.052	UDP hexose	9.1	M-H	565.048	7.72966
571.293	LysoPI(16:0)	9.5	M-H	571.289	6.98904
578.351	LysoPC(18:2)	22	M+AcOH-H	578.346	8.57486
579.03	UDP-hexuronic acid	5.1	M-H	579.027	4.56802
599.322	LysoPI(18:0)	15.6	M-H	599.32	2.3954
604.367	LysoPC(20:3)	14.7	M+AcOH-H	604.362	7.70702
606.078	UDP-N-acetyl-hexosamine	83.9	M-H	606.074	6.77419
606.382	LysoPC(20:2)	96.7	M+AcOH-H	606.378	6.65624
617.158	internal standard - GSSG-13C4,15N2	21	M-H	617.152	9.73783
628.061	UDP-N-acetyl-hexosamine	14.9	M-2H+Na	628.056	7.74274
634.414	LysoPC(22:2)	156.3	M+AcOH-H	634.409	7.57753
662.481	PE(30:0)	13.9	M-H	662.477	6.96892
688.497	PE(32:1)	46.8	M-H	688.492	7.2531
690.511	PE(32:0)	127.2	M-H	690.508	3.90676
704.527	PC(30:0)	7.6	M-H	704.524	4.12883
714.516	PE(34:2)	119	M-H	714.508	11.5837
716.531	PE(34:1)	454.2	M-H	716.524	10.5254
718.541	PE(34:0)	130.6	M-H	718.539	2.33311
728.532	PC(32:2)	5.5	M-H	728.524	11.1197
730.545	PC(32:1)	12.3	M-H	730.539	8.26179
738.515	PE(36:4)	23.5	M-H	738.508	9.33968
742.547	PE(36:2)	409.1	M-H	742.539	9.84933
744.56	PE(36:1)	525.2	M-H	744.555	6.87067
747.525	PG(34:1)	10.8	M-H	747.518	8.65978
752.526	PC(34:4)	37.9	M-H	752.524	2.67523
758.584	HexCer(34:1)	41.3	M+AcOH-H	758.579	7.27932
760.521	PS(34:1)	18.5	M-H	760.513	9.889
762.534	PS(34:0)	45.4	M-H	762.529	5.93735
764.531	PE(38:5)	76.6	M-H	764.524	9.21439
766.541	PE(38:4)	68.9	M-H	766.539	1.71376
770.581	PE(38:2)	36.5	M-H	770.571	14.101
772.595	PE(38:1)	19.5	M-H	772.586	11.7004
773.542	PG(36:2)	20.1	M-H	773.534	10.2482
776.565	PE(P-40:5)	8.9	M-H	776.56	6.22023
786.534	PS(36:2)	5.9	M-H	786.529	6.18502
788.549	PS(36:1)	60.2	M-H	788.545	5.74646
807.513	PI(32:1)	13.3	M-H	807.503	12.7228
809.527	PI(32:0)	80.3	M-H	809.519	10.7064
810.694	HexCer(42:1)	14.1	M-H	810.683	13.3146
819.525	PG(40:7)	13.9	M-H	819.518	8.15128
833.529	PI(34:2)	10.6	M-H	833.519	12.4698
835.543	PI(34:1)	119.3	M-H	835.534	11.1058
837.558	PI(34:0)	87.4	M-H	837.55	9.87604
838.723	HexCer(44:1)	10.5	M-H	838.714	10.7745
861.559	PI(36:2)	32.8	M-H	861.55	10.3256
863.574	PI(36:1)	127.2	M-H	863.566	9.36482
883.539	PI(38:5)	6.2	M-H	883.534	5.02653
885.56	PI(38:4)	14	M-H	885.55	11.6155
887.57	PI(38:3)	8.6	M-H	887.566	4.66099
909.56	PI(40:6)	7.8	M-H	909.55	11.206
911.569	PI(40:5)	321.4	M-H	911.566	3.81365
215.051	isotope	5.1
284.268	isotope	9.6
307.08	isotope	66
308.075	isotope	53.6
310.083	isotope	93
329.061	isotope	10.5
330.058	isotope	8.1
332.066	isotope	17.1
333.06	isotope	6.9
434.339	isotope	8
451.268	isotope	8.1
453.283	isotope	34.8
466.307	isotope	44.9
467.305	isotope	8.8
479.3	isotope	30.2
481.317	isotope	44.7
532.305	isotope	5.5
574.497	isotope	5.5
579.355	isotope	6.5
589.375	isotope	16.2
600.536	isotope	16.5
601.531	isotope	15.1
605.365	isotope	5.3
607.084	isotope	8.1
607.386	isotope	17.5
617.407	isotope	17.7
623.381	isotope	9.8
628.565	isotope	5.6
629.561	isotope	6
633.404	isotope	9.1
635.417	isotope	37.7
651.411	isotope	13.5
656.428	isotope	7.4
665.425	isotope	12.5
679.403	isotope	6
685.617	isotope	6.6
688.554	isotope	45
689.501	isotope	12.7
690.567	isotope	10
691.517	isotope	36
692.519	isotope	5.8
712.448	isotope	7
715.52	isotope	32.1
717.535	isotope	163.3
719.549	isotope	29
724.604	isotope	22.3
726.401	isotope	7.6
735.543	isotope	71.9
736.543	isotope	93.3
737.545	isotope	43.6
738.55	isotope	16.6
739.517	isotope	9.9
741.512	isotope	10.2
743.551	isotope	152.8
745.566	isotope	187.7
746.567	isotope	36.7
747.571	isotope	6
753.525	isotope	15.3
753.553	isotope	22.3
754.524	isotope	15.4
754.548	isotope	21.6
755.432	isotope	10.1
755.551	isotope	6.6
759.588	isotope	16.8
761.569	isotope	20
762.571	isotope	13
763.537	isotope	14.3
765.538	isotope	31.4
767.549	isotope	24.2
769.543	isotope	8.9
771.584	isotope	12
773.599	isotope	6.2
774.544	isotope	9.1
777.598	isotope	5.1
781.548	isotope	14
782.546	isotope	12.8
789.555	isotope	21.4
793.565	isotope	7.3
795.554	isotope	7
800.674	isotope	11.7
801.681	isotope	5.3
808.513	isotope	5.9
810.532	isotope	27.1
811.535	isotope	6.5
811.697	isotope	6.4
819.638	isotope	23.8
820.528	isotope	5.8
820.64	isotope	28.3
821.641	isotope	10.7
822.643	isotope	5.1
827.693	isotope	12.6
829.709	isotope	7.1
833.656	isotope	5.9
834.531	isotope	8.1
835.637	isotope	11.3
836.547	isotope	48
837.647	isotope	27.3
838.561	isotope	30.3
838.651	isotope	14.6
839.648	isotope	6.1
839.727	isotope	5.6
843.488	isotope	5.5
843.684	isotope	5.3
845.659	isotope	16.8
847.671	isotope	143.3
849.672	isotope	53.3
850.667	isotope	26.5
851.674	isotope	8.7
852.671	isotope	5.5
855.722	isotope	5.3
861.691	isotope	13.1
862.566	isotope	11.7
863.669	isotope	95.1
864.581	isotope	52.1
865.583	isotope	12.3
865.676	isotope	121.6
866.679	isotope	79.2
867.68	isotope	27.3
868.687	isotope	10.6
871.718	isotope	17.8
873.691	isotope	41.9
875.702	isotope	123.1
879.701	isotope	9.4
880.682	isotope	7.2
886.562	isotope	6.1
887.714	isotope	12.4
889.726	isotope	14.1
891.702	isotope	64.3
895.716	isotope	15
897.731	isotope	6.3
899.75	isotope	15.2
912.574	isotope	143.9
913.586	isotope	51.6
914.597	isotope	15.3
915.748	isotope	8
916.614	isotope	15.9
917.62	isotope	5.2
970.63	isotope	10
986.624	isotope	6
734.54	mixture of lipid species	227.9
790.556	mixture of lipid species	32.6
818.638	mixture of lipid species	66.2
844.655	mixture of lipid species	36.1
846.668	mixture of lipid species	306.1
848.67	mixture of lipid species	142.2
165.055	unknown	18.4
180.037	unknown	26.1
186.045	unknown	8.2
187.041	unknown	67.7
242.079	unknown	28.7
248.96	unknown	5.2
249.068	unknown	14.8
264.087	unknown	5.9
265.147	unknown	19.4
272.088	unknown	26.7
275.093	unknown	47.8
277.155	unknown	5
291.07	unknown	7.1
297.151	unknown	7.6
309.172	unknown	7.6
311.078	unknown	35.4
311.169	unknown	20.8
325.184	unknown	12.4
357.216	unknown	7.1
409.312	unknown	6.4
433.335	unknown	50.1
455.322	unknown	6.6
473.285	unknown	5.5
540.058	unknown	10.2
546.322	unknown	6.6
552.468	unknown	7.2
557.334	unknown	6.8
560.34	unknown	16.6
564.335	unknown	6
571.501	unknown	26
572.494	unknown	13
573.494	unknown	11.1
580.497	unknown	8.2
588.37	unknown	68.2
594.345	unknown	7
599.535	unknown	60.1
602.387	unknown	6.8
614.389	unknown	13.4
616.402	unknown	86.9
620.396	unknown	8.4
622.377	unknown	44.1
627.564	unknown	19.4
632.397	unknown	27.8
636.395	unknown	8.2
648.394	unknown	9.3
650.41	unknown	53.1
653.41	unknown	11.1
655.424	unknown	23.2
659.521	unknown	7.5
660.392	unknown	9
660.431	unknown	5.7
662.416	unknown	8.3
662.448	unknown	14.8
664.425	unknown	38.3
672.392	unknown	5.1
678.405	unknown	19.7
684.412	unknown	10.6
684.609	unknown	17.4
686.612	unknown	6.2
687.55	unknown	135.4
689.565	unknown	39.1
692.457	unknown	8.5
695.57	unknown	9
697.363	unknown	6.6
698.565	unknown	12.3
700.607	unknown	8.5
702.513	unknown	5.8
702.62	unknown	9.5
709.438	unknown	8.5
710.628	unknown	6.3
711.446	unknown	12.6
712.641	unknown	13.8
714.639	unknown	5.5
722.605	unknown	8.8
723.602	unknown	67.9
725.394	unknown	29
728.639	unknown	6.2
730.647	unknown	7.5
732.531	unknown	38.6
733.538	unknown	14.7
739.409	unknown	6.6
739.544	unknown	8.9
740.51	unknown	34.6
741.39	unknown	5.3
748.527	unknown	9.2
752.55	unknown	76.9
753.425	unknown	93.3
754.43	unknown	28.1
760.564	unknown	57.3
768.542	unknown	32.4
769.422	unknown	10.1
771.646	unknown	8.4
776.596	unknown	10.8
780.547	unknown	35.8
781.461	unknown	9.8
786.581	unknown	7.4
788.594	unknown	11.5
790.603	unknown	9.4
791.553	unknown	10.7
792.563	unknown	19.8
794.558	unknown	21.7
796.554	unknown	7.8
797.661	unknown	8
798.482	unknown	7.6
798.615	unknown	7.2
798.661	unknown	6
799.547	unknown	6.5
799.677	unknown	18.5
802.511	unknown	6.6
804.591	unknown	5.3
808.575	unknown	6.7
826.683	unknown	20.1
828.7	unknown	16.7
832.655	unknown	11.6
834.633	unknown	21.7
836.648	unknown	51.9
842.49	unknown	14
842.68	unknown	10.1
854.72	unknown	10.8
856.728	unknown	7.7
858.673	unknown	6.4
860.683	unknown	28.4
862.666	unknown	213.7
864.674	unknown	261.8
870.714	unknown	47.8
872.688	unknown	81.2
874.479	unknown	10.1
874.701	unknown	262.4
876.702	unknown	112.9
877.7	unknown	37.4
878.699	unknown	26.5
881.535	unknown	5.2
884.732	unknown	5.2
886.711	unknown	24
888.725	unknown	37.5
890.695	unknown	145.3
891.605	unknown	5.2
892.71	unknown	168.5
893.71	unknown	61.9
894.709	unknown	44.2
896.726	unknown	13
898.748	unknown	30.5
900.732	unknown	7.9
902.736	unknown	7.2
914.74	unknown	15.5
915.612	unknown	30.8
916.761	unknown	16.1
917.76	unknown	7.5
929.587	unknown	6.3
965.519	unknown	8.6
965.857	unknown	6.9
967.604	unknown	9
968.605	unknown	6.2
969.629	unknown	20.3
985.626	unknown	8.2
