# Supplementary material for: Information-rich high-throughput cellular assays using acoustic mist ionisation mass spectrometry
Source: Royal Society of Chemistry journal article supplement (doi:10.1039/d0an01519a), 2020-10-23
Supplement: d0an01519a2.xlsx [file d0an01519a2.xlsx]

## Sheet: info
MCF7 data acquired in negative ion mode over 3.4 min, 0.53 s per sample
HuT 78 cells, 10k per well
Raw AMI-MS spectra imported directly from MassLynx
Three MS spectra shown side by side are from the same well and were acquired at different rates:
	1. Spectrum acquired in 0.76 s (total sample to sample rate including stage movement)
	2. Spectrum acquired in 2.3 s
	3. Spectrum acquired in 7.6 s

## Sheet: HuT 78 spectra
0.76 s acquisition		2.3 s acquisition		7.6 s acquisition
m/z	Intensity (a.u.)	m/z	Intensity (a.u.)	m/z	Intensity (a.u.)
100.006	0	100.006	0	100	0
100.008	26	100.008	26	100.002	21
100.01	0	100.01	0	100.004	42
100.025	0	100.021	0	100.006	101
100.027	21	100.023	19	100.008	26
100.029	46	100.025	3	100.01	0
100.031	0	100.027	21	100.015	0
100.033	20	100.029	114	100.017	36
100.035	12	100.031	21	100.019	53
100.037	6	100.033	20	100.021	81
100.039	0	100.035	28	100.023	74
100.052	0	100.037	20	100.025	3
100.054	23	100.039	19	100.027	46
100.056	0	100.041	0	100.029	134
100.078	0	100.045	0	100.031	40
100.08	24	100.047	241	100.033	20
100.082	12	100.049	12	100.035	28
100.084	53	100.052	0	100.037	20
100.086	13	100.054	23	100.039	19
100.088	0	100.056	0	100.041	52
100.093	0	100.058	0	100.043	46
100.094	14	100.06	6	100.045	0
100.097	19	100.062	49	100.047	247
100.099	24	100.064	0	100.049	169
100.101	0	100.066	23	100.052	36
100.103	8	100.068	77	100.054	23
100.105	23	100.07	0	100.056	0
100.107	0	100.072	47	100.058	0
100.109	25	100.074	7	100.06	36
100.111	17	100.076	8	100.062	139
100.113	0	100.078	68	100.064	46
100.144	0	100.08	118	100.066	61
100.146	13	100.082	12	100.068	88
100.148	30	100.084	60	100.07	87
100.15	0	100.086	29	100.072	47
100.164	0	100.088	0	100.074	7
100.166	71	100.093	0	100.076	8
100.168	63	100.094	25	100.078	68
100.17	0	100.097	36	100.08	118
100.181	0	100.099	24	100.082	61
100.183	19	100.101	0	100.084	92
100.185	7	100.103	62	100.086	140
100.187	0	100.105	37	100.088	15
100.189	0	100.107	0	100.09	52
100.191	8	100.109	77	100.093	22
100.193	25	100.111	54	100.094	30
100.195	28	100.113	18	100.097	90
100.197	0	100.115	0	100.099	24
100.199	35	100.117	19	100.101	0
100.201	45	100.119	0	100.103	153
100.203	0	100.127	0	100.105	70
100.222	0	100.129	8	100.107	0
100.224	14	100.131	23	100.109	102
100.226	26	100.133	18	100.111	68
100.228	35	100.135	48	100.113	92
100.23	4	100.138	0	100.115	36
100.232	0	100.144	0	100.117	26
100.236	0	100.146	13	100.119	18
100.238	44	100.148	30	100.121	24
100.24	35	100.15	13	100.123	0
100.242	0	100.152	9	100.127	0
100.244	0	100.154	0	100.129	8
100.246	13	100.156	0	100.131	23
100.248	21	100.158	31	100.133	35
100.25	0	100.16	13	100.135	85
100.291	0	100.162	57	100.138	12
100.293	19	100.164	2	100.14	57
100.295	0	100.166	94	100.142	22
100.299	0	100.168	90	100.144	25
100.302	13	100.17	11	100.146	13
100.304	80	100.172	24	100.148	42
100.306	28	100.174	13	100.15	25
100.308	41	100.177	0	100.152	31
100.31	73	100.181	0	100.154	0
100.312	21	100.183	19	100.156	0
100.314	33	100.185	7	100.158	31
100.316	0	100.187	0	100.16	13
100.363	0	100.189	0	100.162	81
100.365	22	100.191	21	100.164	61
100.367	0	100.193	81	100.166	101
100.369	14	100.195	28	100.168	90
100.371	7	100.197	0	100.17	11
100.373	0	100.199	54	100.172	24
100.379	0	100.201	45	100.174	13
100.382	15	100.203	0	100.177	28
100.384	13	100.222	0	100.179	15
100.386	0	100.224	21	100.181	0
100.388	0	100.226	56	100.183	19
100.39	23	100.228	35	100.185	7
100.392	4	100.23	29	100.187	0
100.394	0	100.232	32	100.189	0
100.398	0	100.234	44	100.191	21
100.4	17	100.236	41	100.193	81
100.402	30	100.238	75	100.195	28
100.404	0	100.24	42	100.197	18
100.439	0	100.242	0	100.199	112
100.441	18	100.244	16	100.201	78
100.443	9	100.246	70	100.203	37
100.445	0	100.248	21	100.205	75
100.496	0	100.25	0	100.207	11
100.499	27	100.252	0	100.209	0
100.501	11	100.254	14	100.211	19
100.503	0	100.257	67	100.213	4
100.507	0	100.258	33	100.216	65
100.509	12	100.261	0	100.218	9
100.511	21	100.263	19	100.22	0
100.513	9	100.265	0	100.222	15
100.515	0	100.267	0	100.224	55
100.523	0	100.269	19	100.226	70
100.525	47	100.271	0	100.228	49
100.527	13	100.273	0	100.23	55
100.529	0	100.275	16	100.232	32
100.531	0	100.277	75	100.234	44
100.534	14	100.279	46	100.236	56
100.536	7	100.281	0	100.238	99
100.538	0	100.291	0	100.24	54
100.552	0	100.293	19	100.242	0
100.554	35	100.295	0	100.244	16
100.556	12	100.299	0	100.246	103
100.558	19	100.302	13	100.248	99
100.56	5	100.304	80	100.25	13
100.562	0	100.306	28	100.252	0
100.57	0	100.308	55	100.254	14
100.573	30	100.31	89	100.257	67
100.575	16	100.312	21	100.258	60
100.577	0	100.314	33	100.261	27
100.579	0	100.316	48	100.263	19
100.581	13	100.318	29	100.265	37
100.583	15	100.32	2	100.267	40
100.585	12	100.322	28	100.269	19
100.587	0	100.324	0	100.271	0
100.589	0	100.328	0	100.273	0
100.591	31	100.33	12	100.275	26
100.593	9	100.332	51	100.277	98
100.595	0	100.334	27	100.279	54
100.597	51	100.337	0	100.281	62
100.599	20	100.338	0	100.283	34
100.601	0	100.341	8	100.285	0
100.62	0	100.343	30	100.287	26
100.622	13	100.345	0	100.289	34
100.624	28	100.347	0	100.291	0
100.626	0	100.349	2	100.293	19
100.634	0	100.351	47	100.295	0
100.636	11	100.353	24	100.297	0
100.638	29	100.355	12	100.299	53
100.64	0	100.357	0	100.302	72
100.642	0	100.359	0	100.304	96
100.644	12	100.361	121	100.306	49
100.647	8	100.363	75	100.308	70
100.648	0	100.365	62	100.31	89
100.663	0	100.367	25	100.312	115
100.665	16	100.369	61	100.314	116
100.667	34	100.371	29	100.316	48
100.669	0	100.373	0	100.318	29
100.696	0	100.379	0	100.32	2
100.698	22	100.382	49	100.322	28
100.7	33	100.384	89	100.324	0
100.702	0	100.386	31	100.326	0
100.706	0	100.388	6	100.328	12
100.708	3	100.39	23	100.33	121
100.71	38	100.392	4	100.332	86
100.712	0	100.394	19	100.334	27
100.722	0	100.396	0	100.337	0
100.725	29	100.398	0	100.338	0
100.727	5	100.4	17	100.341	30
100.729	0	100.402	30	100.343	30
100.77	0	100.404	0	100.345	0
100.772	2	100.406	20	100.347	57
100.774	28	100.408	24	100.349	52
100.776	0	100.41	0	100.351	47
100.819	0	100.412	8	100.353	24
100.821	24	100.414	15	100.355	12
100.823	13	100.416	19	100.357	0
100.825	17	100.418	65	100.359	0
100.827	6	100.421	32	100.361	135
100.829	0	100.423	0	100.363	103
100.877	0	100.425	31	100.365	70
100.879	2	100.427	78	100.367	80
100.881	43	100.429	56	100.369	61
100.883	38	100.431	7	100.371	29
100.885	25	100.433	0	100.373	21
100.887	0	100.435	39	100.375	68
100.889	7	100.437	104	100.377	2
100.891	31	100.439	0	100.379	13
100.893	0	100.441	42	100.382	58
100.895	0	100.443	43	100.384	118
100.897	3	100.445	0	100.386	74
100.899	48	100.468	0	100.388	22
100.901	0	100.47	24	100.39	23
100.91	0	100.472	48	100.392	14
100.912	31	100.474	0	100.394	47
100.914	33	100.476	0	100.396	8
100.916	0	100.478	36	100.398	0
100.957	0	100.48	17	100.4	17
100.959	12	100.482	0	100.402	30
100.961	6	100.484	22	100.404	0
100.963	0	100.486	0	100.406	73
100.965	23	100.496	0	100.408	68
100.967	12	100.499	27	100.41	16
100.969	34	100.501	11	100.412	138
100.971	25	100.503	0	100.414	45
100.973	77	100.505	22	100.416	26
100.975	0	100.507	29	100.418	77
100.98	0	100.509	12	100.421	71
100.982	2	100.511	21	100.423	18
100.984	26	100.513	9	100.425	51
100.986	0	100.515	0	100.427	78
100.988	0	100.517	6	100.429	56
100.99	7	100.519	12	100.431	7
100.992	19	100.521	0	100.433	0
100.994	0	100.523	0	100.435	39
101.025	0	100.525	88	100.437	138
101.027	6	100.527	55	100.439	88
101.029	12	100.529	17	100.441	54
101.031	0	100.531	30	100.443	43
101.033	49	100.534	36	100.445	0
101.035	1	100.536	7	100.447	2
101.037	0	100.538	0	100.449	28
101.062	0	100.542	0	100.451	0
101.064	14	100.544	14	100.456	0
101.066	7	100.546	22	100.457	24
101.068	0	100.548	0	100.46	84
101.07	0	100.552	0	100.462	6
101.072	25	100.554	35	100.464	0
101.074	10	100.556	12	100.466	0
101.076	0	100.558	70	100.468	35
101.078	19	100.56	28	100.47	55
101.081	7	100.562	0	100.472	48
101.082	0	100.566	0	100.474	0
101.099	0	100.568	11	100.476	0
101.101	23	100.57	25	100.478	36
101.103	0	100.573	74	100.48	17
101.107	0	100.575	29	100.482	0
101.109	18	100.577	0	100.484	22
101.111	22	100.579	0	100.486	13
101.113	0	100.581	13	100.488	9
101.115	44	100.583	15	100.49	0
101.118	15	100.585	12	100.492	33
101.12	0	100.587	0	100.495	67
101.14	0	100.589	0	100.496	0
101.142	3	100.591	56	100.499	27
101.144	89	100.593	27	100.501	11
101.146	48	100.595	0	100.503	0
101.148	14	100.597	51	100.505	22
101.15	0	100.599	20	100.507	150
101.155	0	100.601	0	100.509	145
101.157	59	100.612	0	100.511	38
101.159	40	100.614	7	100.513	21
101.161	0	100.616	42	100.515	0
101.192	0	100.618	7	100.517	46
101.194	35	100.62	68	100.519	44
101.196	0	100.622	15	100.521	0
101.198	14	100.624	28	100.523	0
101.2	20	100.626	41	100.525	113
101.202	0	100.628	52	100.527	88
101.214	0	100.63	10	100.529	29
101.216	22	100.632	0	100.531	30
101.219	0	100.634	0	100.534	36
101.235	0	100.636	11	100.536	7
101.237	63	100.638	29	100.538	12
101.239	9	100.64	0	100.54	30
101.241	35	100.642	0	100.542	33
101.243	0	100.644	12	100.544	14
101.247	0	100.647	8	100.546	22
101.249	29	100.648	0	100.548	0
101.251	42	100.651	56	100.55	0
101.254	0	100.653	40	100.552	12
101.266	0	100.655	12	100.554	74
101.268	9	100.657	12	100.556	25
101.27	42	100.659	5	100.558	131
101.272	0	100.661	25	100.56	60
101.274	0	100.663	0	100.562	11
101.276	15	100.665	16	100.564	102
101.278	10	100.667	60	100.566	90
101.28	0	100.669	36	100.568	39
101.289	0	100.671	8	100.57	65
101.291	10	100.673	0	100.573	74
101.293	36	100.677	0	100.575	75
101.295	24	100.679	22	100.577	2
101.297	0	100.681	9	100.579	0
101.309	0	100.683	67	100.581	13
101.311	58	100.686	0	100.583	51
101.313	6	100.69	0	100.585	46
101.315	18	100.692	7	100.587	0
101.317	0	100.694	14	100.589	5
101.32	106	100.696	0	100.591	77
101.322	48	100.698	22	100.593	27
101.324	0	100.7	33	100.595	0
101.326	29	100.702	0	100.597	51
101.328	5	100.706	0	100.599	20
101.33	0	100.708	24	100.601	0
101.332	12	100.71	92	100.612	0
101.334	8	100.712	10	100.614	7
101.336	0	100.714	36	100.616	42
101.338	35	100.716	7	100.618	7
101.34	14	100.718	14	100.62	68
101.342	0	100.721	0	100.622	195
101.379	0	100.722	23	100.624	36
101.381	39	100.725	42	100.626	41
101.383	0	100.727	35	100.628	52
101.392	0	100.729	28	100.63	49
101.394	6	100.731	0	100.632	6
101.396	119	100.733	0	100.634	0
101.398	13	100.735	57	100.636	17
101.4	0	100.737	28	100.638	143
101.406	0	100.739	0	100.64	2
101.408	80	100.741	0	100.642	42
101.41	0	100.743	12	100.644	24
101.423	0	100.745	55	100.647	15
101.425	16	100.747	7	100.648	14
101.427	16	100.749	0	100.651	56
101.429	0	100.753	0	100.653	65
101.431	0	100.755	10	100.655	16
101.433	6	100.757	101	100.657	22
101.435	17	100.76	14	100.659	15
101.437	0	100.762	7	100.661	146
101.439	26	100.764	9	100.663	9
101.441	39	100.766	56	100.665	16
101.443	0	100.768	0	100.667	70
101.491	0	100.77	0	100.669	52
101.493	4	100.772	2	100.671	8
101.495	56	100.774	28	100.673	0
101.497	40	100.776	0	100.675	8
101.499	0	100.778	19	100.677	12
101.501	12	100.78	0	100.679	27
101.503	8	100.782	4	100.681	31
101.505	0	100.784	53	100.683	67
101.507	5	100.786	0	100.686	0
101.509	22	100.796	0	100.69	0
101.511	0	100.799	8	100.692	7
101.515	0	100.801	12	100.694	14
101.517	28	100.803	0	100.696	0
101.519	65	100.819	0	100.698	22
101.522	76	100.821	34	100.7	45
101.524	0	100.823	90	100.702	14
101.528	0	100.825	22	100.704	25
101.53	56	100.827	6	100.706	0
101.532	5	100.829	11	100.708	24
101.534	0	100.832	31	100.71	108
101.546	0	100.834	161	100.712	53
101.548	9	100.836	0	100.714	62
101.55	18	100.838	0	100.716	19
101.553	0	100.84	76	100.718	130
101.557	0	100.842	58	100.721	69
101.559	12	100.844	0	100.722	23
101.561	45	100.846	23	100.725	71
101.563	0	100.848	0	100.727	46
101.569	0	100.854	0	100.729	28
101.571	14	100.856	11	100.731	29
101.573	7	100.858	22	100.733	63
101.575	22	100.86	0	100.735	90
101.577	126	100.862	21	100.737	40
101.579	26	100.864	11	100.739	6
101.582	0	100.866	0	100.741	0
101.592	0	100.868	37	100.743	12
101.594	20	100.871	13	100.745	66
101.596	5	100.873	16	100.747	29
101.598	0	100.875	0	100.749	0
101.6	0	100.877	0	100.751	22
101.602	12	100.879	2	100.753	56
101.604	6	100.881	43	100.755	10
101.606	0	100.883	51	100.757	101
101.61	0	100.885	57	100.76	14
101.612	24	100.887	0	100.762	7
101.615	4	100.889	7	100.764	9
101.617	0	100.891	31	100.766	56
101.639	0	100.893	0	100.768	0
101.641	9	100.895	0	100.77	20
101.643	101	100.897	38	100.772	26
101.645	0	100.899	55	100.774	28
101.647	0	100.901	20	100.776	14
101.65	34	100.903	32	100.778	26
101.652	61	100.906	19	100.78	0
101.654	0	100.908	12	100.782	4
101.662	0	100.91	8	100.784	53
101.664	30	100.912	31	100.786	47
101.666	59	100.914	64	100.788	0
101.668	7	100.916	0	100.792	0
101.67	0	100.943	0	100.794	13
101.674	0	100.945	39	100.796	55
101.676	87	100.947	46	100.799	11
101.678	3	100.949	0	100.801	91
101.681	0	100.957	0	100.803	19
101.683	12	100.959	12	100.805	12
101.685	8	100.961	6	100.807	0
101.687	0	100.963	0	100.809	50
101.693	0	100.965	23	100.811	14
101.695	26	100.967	17	100.813	0
101.697	0	100.969	145	100.815	0
101.699	0	100.971	37	100.817	37
101.701	12	100.973	83	100.819	0
101.703	6	100.975	0	100.821	40
101.705	0	100.978	0	100.823	102
101.707	42	100.98	6	100.825	28
101.71	27	100.982	20	100.827	18
101.712	0	100.984	26	100.829	11
101.714	0	100.986	0	100.832	60
101.716	23	100.988	22	100.834	214
101.718	0	100.99	26	100.836	0
101.724	0	100.992	19	100.838	0
101.726	12	100.994	0	100.84	76
101.728	6	101.004	0	100.842	58
101.73	0	101.006	2	100.844	0
101.732	0	101.008	126	100.846	23
101.734	54	101.01	0	100.848	0
101.736	5	101.015	0	100.854	0
101.738	0	101.017	16	100.856	11
101.74	0	101.019	14	100.858	61
101.743	4	101.021	0	100.86	42
101.745	29	101.023	0	100.862	78
101.747	0	101.025	9	100.864	11
101.749	0	101.027	48	100.866	0
101.751	23	101.029	12	100.868	37
101.753	0	101.031	0	100.871	13
101.755	7	101.033	49	100.873	44
101.757	14	101.035	1	100.875	83
101.759	0	101.037	0	100.877	8
101.778	0	101.056	0	100.879	39
101.78	19	101.058	23	100.881	72
101.782	7	101.06	25	100.883	51
101.784	0	101.062	0	100.885	57
101.792	0	101.064	14	100.887	0
101.794	18	101.066	23	100.889	25
101.796	0	101.068	18	100.891	78
101.805	0	101.07	23	100.893	0
101.807	31	101.072	42	100.895	0
101.809	6	101.074	16	100.897	129
101.811	0	101.076	0	100.899	84
101.817	0	101.078	19	100.901	73
101.819	47	101.081	50	100.903	35
101.821	39	101.082	31	100.906	19
101.823	0	101.085	6	100.908	31
101.895	0	101.087	0	100.91	13
101.897	19	101.089	22	100.912	31
101.9	0	101.091	41	100.914	85
101.904	0	101.093	6	100.916	8
101.906	87	101.095	24	100.918	12
101.908	16	101.097	0	100.92	34
101.91	0	101.099	0	100.922	64
101.918	0	101.101	47	100.924	144
101.92	58	101.103	152	100.926	33
101.922	81	101.105	53	100.928	0
101.924	0	101.107	0	100.932	0
101.928	0	101.109	18	100.934	3
101.931	27	101.111	22	100.936	68
101.933	7	101.113	0	100.939	38
101.935	0	101.115	44	100.941	0
101.986	0	101.118	15	100.943	15
101.989	12	101.12	35	100.945	73
101.991	26	101.122	0	100.947	65
101.993	9	101.14	0	100.949	7
101.995	0	101.142	3	100.951	0
102.009	0	101.144	89	100.953	0
102.011	6	101.146	48	100.955	4
102.013	18	101.148	14	100.957	53
102.015	0	101.15	14	100.959	44
102.03	0	101.153	31	100.961	15
102.032	60	101.155	22	100.963	3
102.034	5	101.157	65	100.965	132
102.036	0	101.159	183	100.967	50
102.038	0	101.161	9	100.969	145
102.04	9	101.163	22	100.971	49
102.042	20	101.165	42	100.973	108
102.044	0	101.167	67	100.975	24
102.049	0	101.169	3	100.978	19
102.051	8	101.171	0	100.98	6
102.053	25	101.173	13	100.982	20
102.055	0	101.175	27	100.984	26
102.057	0	101.177	0	100.986	17
102.059	33	101.179	0	100.988	31
102.061	15	101.181	19	100.99	48
102.063	0	101.183	35	100.992	60
102.065	25	101.186	41	100.994	0
102.067	0	101.188	5	100.998	0
102.078	0	101.19	0	101	6
102.079	12	101.192	2	101.002	64
102.082	8	101.194	145	101.004	12
102.084	0	101.196	0	101.006	2
102.102	0	101.198	14	101.008	135
102.104	18	101.2	39	101.01	44
102.106	22	101.202	0	101.013	0
102.109	0	101.204	21	101.015	0
102.119	0	101.206	46	101.017	41
102.121	34	101.208	60	101.019	46
102.123	9	101.21	87	101.021	0
102.125	0	101.212	0	101.023	11
102.131	0	101.214	0	101.025	42
102.133	35	101.216	22	101.027	48
102.135	12	101.219	0	101.029	12
102.138	0	101.223	0	101.031	0
102.139	0	101.225	34	101.033	94
102.142	29	101.227	23	101.035	25
102.144	0	101.229	8	101.037	78
102.191	0	101.231	0	101.039	53
102.193	8	101.235	0	101.041	27
102.195	25	101.237	63	101.043	12
102.198	0	101.239	9	101.046	34
102.243	0	101.241	35	101.047	0
102.245	20	101.243	0	101.056	0
102.247	78	101.247	0	101.058	23
102.249	24	101.249	29	101.06	25
102.251	0	101.251	63	101.062	9
102.255	0	101.254	43	101.064	54
102.258	7	101.256	9	101.066	74
102.26	21	101.258	0	101.068	61
102.262	33	101.262	0	101.07	33
102.264	20	101.264	6	101.072	50
102.266	0	101.266	18	101.074	39
102.28	0	101.268	9	101.076	78
102.282	6	101.27	42	101.078	27
102.284	12	101.272	0	101.081	82
102.287	0	101.274	0	101.082	78
102.289	0	101.276	15	101.085	13
102.291	25	101.278	10	101.087	0
102.293	60	101.28	22	101.089	22
102.295	10	101.282	6	101.091	41
102.297	10	101.284	0	101.093	6
102.299	0	101.287	31	101.095	24
102.301	0	101.289	33	101.097	0
102.303	68	101.291	19	101.099	0
102.305	41	101.293	54	101.101	54
102.307	0	101.295	24	101.103	184
102.365	0	101.297	44	101.105	99
102.367	6	101.299	25	101.107	121
102.369	18	101.301	0	101.109	49
102.371	0	101.305	0	101.111	22
102.374	8	101.307	19	101.113	0
102.376	35	101.309	0	101.115	44
102.378	20	101.311	58	101.118	15
102.38	0	101.313	13	101.12	35
102.438	0	101.315	32	101.122	0
102.44	37	101.317	4	101.126	0
102.442	12	101.32	130	101.128	17
102.444	0	101.322	48	101.13	20
102.465	0	101.324	0	101.132	0
102.467	6	101.326	29	101.134	6
102.469	67	101.328	5	101.136	12
102.471	0	101.33	0	101.138	52
102.473	7	101.332	12	101.14	51
102.475	80	101.334	8	101.142	60
102.477	0	101.336	0	101.144	103
102.479	0	101.338	35	101.146	48
102.481	24	101.34	26	101.148	19
102.483	4	101.342	8	101.15	34
102.486	51	101.344	20	101.153	69
102.488	7	101.346	29	101.155	59
102.49	0	101.348	61	101.157	65
102.498	0	101.35	0	101.159	183
102.5	10	101.369	0	101.161	9
102.502	35	101.371	21	101.163	22
102.504	0	101.373	9	101.165	42
102.508	0	101.375	81	101.167	67
102.51	9	101.377	29	101.169	3
102.513	18	101.379	41	101.171	0
102.514	0	101.381	165	101.173	13
102.517	27	101.383	12	101.175	27
102.519	6	101.385	0	101.177	0
102.521	0	101.392	0	101.179	0
102.531	0	101.394	46	101.181	19
102.533	6	101.396	127	101.183	35
102.535	18	101.398	21	101.186	41
102.537	0	101.4	25	101.188	5
102.55	0	101.402	0	101.19	4
102.552	31	101.406	0	101.192	26
102.554	99	101.408	80	101.194	174
102.556	33	101.41	0	101.196	5
102.558	0	101.412	36	101.198	14
102.562	0	101.414	4	101.2	39
102.564	6	101.416	12	101.202	0
102.566	12	101.418	6	101.204	91
102.569	0	101.421	0	101.206	54
102.57	28	101.423	8	101.208	60
102.573	28	101.425	39	101.21	87
102.575	0	101.427	16	101.212	25
102.581	0	101.429	0	101.214	30
102.583	9	101.431	0	101.216	86
102.585	20	101.433	6	101.219	44
102.587	0	101.435	17	101.221	0
102.616	0	101.437	0	101.223	47
102.618	5	101.439	26	101.225	41
102.62	33	101.441	82	101.227	23
102.622	0	101.443	26	101.229	46
102.624	3	101.445	43	101.231	16
102.626	79	101.447	6	101.233	14
102.629	0	101.449	0	101.235	39
102.641	0	101.458	0	101.237	63
102.643	18	101.46	11	101.239	9
102.645	24	101.462	33	101.241	35
102.647	0	101.464	0	101.243	0
102.666	0	101.472	0	101.247	0
102.668	17	101.474	23	101.249	29
102.67	25	101.476	0	101.251	63
102.672	0	101.484	0	101.254	66
102.676	0	101.487	4	101.256	135
102.678	26	101.489	59	101.258	0
102.68	73	101.491	7	101.262	0
102.683	0	101.493	11	101.264	6
102.693	0	101.495	86	101.266	18
102.695	19	101.497	40	101.268	9
102.697	0	101.499	0	101.27	42
102.705	0	101.501	12	101.272	0
102.707	38	101.503	8	101.274	9
102.71	59	101.505	0	101.276	67
102.712	0	101.507	5	101.278	16
102.714	17	101.509	22	101.28	47
102.716	43	101.511	0	101.282	57
102.718	0	101.515	0	101.284	89
102.726	0	101.517	28	101.287	68
102.728	75	101.519	65	101.289	43
102.73	11	101.522	76	101.291	19
102.732	0	101.524	0	101.293	123
102.751	0	101.526	27	101.295	26
102.753	43	101.528	4	101.297	44
102.755	1	101.53	56	101.299	25
102.757	0	101.532	5	101.301	0
102.759	8	101.534	64	101.303	0
102.761	23	101.536	15	101.305	12
102.763	0	101.538	0	101.307	63
102.795	0	101.542	0	101.309	9
102.797	18	101.544	42	101.311	75
102.799	0	101.546	3	101.313	43
102.83	0	101.548	21	101.315	40
102.832	4	101.55	46	101.317	20
102.834	36	101.553	65	101.32	130
102.836	0	101.555	0	101.322	48
102.859	0	101.557	0	101.324	34
102.861	3	101.559	20	101.326	29
102.863	51	101.561	96	101.328	5
102.865	0	101.563	7	101.33	0
102.876	0	101.565	0	101.332	12
102.878	45	101.567	0	101.334	30
102.88	6	101.569	66	101.336	55
102.882	0	101.571	34	101.338	84
102.903	0	101.573	14	101.34	45
102.905	17	101.575	41	101.342	8
102.907	9	101.577	126	101.344	20
102.909	0	101.579	26	101.346	29
102.923	0	101.582	0	101.348	114
102.925	26	101.584	0	101.35	40
102.928	0	101.586	18	101.353	0
102.967	0	101.588	16	101.355	7
102.969	12	101.59	3	101.357	36
102.971	45	101.592	68	101.359	32
102.973	0	101.594	32	101.361	44
102.975	0	101.596	43	101.363	0
102.978	78	101.598	16	101.369	0
102.98	20	101.6	15	101.371	21
102.982	0	101.602	12	101.373	9
102.984	5	101.604	6	101.375	81
102.986	93	101.606	0	101.377	29
102.988	0	101.608	32	101.379	41
103.007	0	101.61	27	101.381	188
103.009	19	101.612	24	101.383	62
103.011	0	101.615	4	101.385	0
103.013	13	101.617	0	101.388	0
103.015	48	101.625	0	101.39	6
103.017	0	101.627	16	101.392	12
103.023	0	101.629	49	101.394	46
103.025	10	101.631	0	101.396	127
103.027	12	101.639	0	101.398	21
103.029	33	101.641	9	101.4	25
103.031	95	101.643	111	101.402	0
103.034	0	101.645	105	101.404	19
103.036	124	101.647	41	101.406	0
103.038	43	101.65	72	101.408	80
103.04	0	101.652	75	101.41	4
103.044	0	101.654	0	101.412	52
103.046	60	101.656	0	101.414	4
103.048	7	101.658	6	101.416	12
103.05	0	101.66	75	101.418	64
103.061	0	101.662	24	101.421	56
103.063	14	101.664	30	101.423	30
103.065	7	101.666	85	101.425	39
103.067	0	101.668	11	101.427	16
103.071	0	101.67	0	101.429	60
103.073	16	101.674	0	101.431	5
103.075	31	101.676	87	101.433	6
103.077	6	101.678	3	101.435	17
103.079	23	101.681	0	101.437	0
103.081	0	101.683	12	101.439	49
103.092	0	101.685	8	101.441	101
103.094	8	101.687	0	101.443	37
103.096	12	101.689	38	101.445	117
103.098	0	101.691	73	101.447	24
103.106	0	101.693	26	101.449	21
103.109	24	101.695	88	101.451	0
103.111	4	101.697	0	101.454	12
103.113	0	101.699	0	101.456	93
103.117	0	101.701	12	101.458	35
103.119	26	101.703	6	101.46	41
103.121	2	101.705	0	101.462	57
103.123	27	101.707	42	101.464	0
103.125	32	101.71	52	101.472	0
103.127	0	101.712	34	101.474	52
103.129	54	101.714	103	101.476	24
103.131	5	101.716	26	101.478	64
103.133	0	101.718	0	101.48	19
103.138	0	101.724	0	101.482	39
103.14	11	101.726	12	101.484	17
103.142	64	101.728	39	101.487	13
103.144	25	101.73	32	101.489	100
103.146	0	101.732	82	101.491	35
103.171	0	101.734	66	101.493	11
103.173	29	101.736	5	101.495	101
103.175	0	101.738	0	101.497	96
103.179	0	101.74	0	101.499	11
103.181	7	101.743	4	101.501	142
103.183	14	101.745	70	101.503	62
103.185	0	101.747	6	101.505	0
103.21	0	101.749	0	101.507	5
103.213	14	101.751	23	101.509	22
103.215	7	101.753	0	101.511	10
103.217	0	101.755	7	101.513	16
103.231	0	101.757	14	101.515	0
103.233	22	101.759	0	101.517	30
103.235	0	101.763	0	101.519	112
103.242	0	101.765	49	101.522	102
103.244	29	101.767	8	101.524	0
103.246	5	101.769	0	101.526	27
103.248	0	101.778	0	101.528	4
103.262	0	101.78	38	101.53	56
103.264	44	101.782	14	101.532	5
103.267	13	101.784	0	101.534	76
103.269	0	101.79	0	101.536	71
103.294	0	101.792	36	101.538	54
103.296	17	101.794	50	101.54	9
103.298	27	101.796	4	101.542	0
103.3	0	101.798	0	101.544	42
103.31	0	101.805	0	101.546	28
103.312	21	101.807	31	101.548	44
103.314	46	101.809	6	101.55	50
103.317	12	101.811	0	101.553	65
103.319	26	101.813	0	101.555	0
103.321	9	101.815	44	101.557	0
103.323	20	101.817	23	101.559	20
103.325	0	101.819	47	101.561	96
103.339	0	101.821	39	101.563	7
103.341	28	101.823	0	101.565	58
103.344	29	101.829	0	101.567	38
103.346	0	101.831	19	101.569	85
103.391	0	101.833	13	101.571	34
103.394	29	101.835	26	101.573	14
103.396	16	101.838	28	101.575	49
103.398	0	101.84	43	101.577	152
103.419	0	101.842	36	101.579	67
103.421	10	101.844	0	101.582	0
103.423	12	101.862	0	101.584	0
103.425	0	101.864	9	101.586	18
103.427	17	101.867	20	101.588	16
103.429	46	101.869	0	101.59	3
103.431	18	101.871	0	101.592	68
103.433	28	101.873	17	101.594	32
103.435	0	101.875	9	101.596	43
103.439	0	101.877	0	101.598	16
103.442	14	101.879	31	101.6	15
103.444	11	101.881	40	101.602	12
103.446	0	101.883	67	101.604	6
103.45	0	101.885	0	101.606	6
103.452	20	101.887	7	101.608	50
103.454	20	101.889	41	101.61	36
103.456	0	101.891	12	101.612	54
103.479	0	101.893	0	101.615	45
103.481	7	101.895	8	101.617	0
103.483	31	101.897	31	101.625	0
103.485	29	101.9	0	101.627	16
103.487	5	101.904	0	101.629	57
103.489	0	101.906	87	101.631	25
103.498	0	101.908	16	101.633	0
103.5	33	101.91	10	101.637	0
103.502	12	101.912	10	101.639	14
103.504	0	101.914	0	101.641	51
103.506	4	101.916	14	101.643	111
103.508	42	101.918	24	101.645	105
103.51	0	101.92	58	101.647	41
103.523	0	101.922	81	101.65	72
103.525	15	101.924	37	101.652	75
103.527	13	101.927	33	101.654	0
103.529	0	101.928	12	101.656	0
103.535	0	101.931	51	101.658	6
103.537	23	101.933	11	101.66	94
103.539	4	101.935	0	101.662	31
103.541	0	101.943	0	101.664	36
103.548	0	101.945	39	101.666	103
103.55	6	101.947	54	101.668	182
103.552	12	101.949	0	101.67	83
103.554	0	101.97	0	101.672	0
103.61	0	101.972	25	101.674	0
103.612	16	101.974	11	101.676	87
103.614	34	101.976	30	101.678	3
103.617	0	101.978	0	101.681	0
103.633	0	101.986	0	101.683	71
103.635	11	101.989	12	101.685	26
103.637	25	101.991	45	101.687	4
103.639	0	101.993	9	101.689	57
103.656	0	101.995	26	101.691	101
103.658	29	101.997	46	101.693	155
103.66	55	101.999	0	101.695	162
103.662	0	102.007	0	101.697	20
103.667	0	102.009	39	101.699	12
103.669	6	102.011	93	101.701	12
103.671	18	102.013	38	101.703	6
103.673	0	102.015	67	101.705	0
103.685	0	102.017	8	101.707	42
103.687	18	102.019	0	101.71	52
103.689	50	102.026	0	101.712	34
103.692	27	102.028	97	101.714	103
103.694	0	102.03	10	101.716	26
103.71	0	102.032	79	101.718	0
103.712	17	102.034	5	101.72	29
103.715	6	102.036	0	101.722	0
103.717	0	102.038	0	101.724	0
103.721	0	102.04	17	101.726	12
103.723	16	102.042	32	101.728	39
103.725	81	102.044	0	101.73	63
103.727	23	102.049	0	101.732	87
103.729	0	102.051	8	101.734	79
103.731	6	102.053	25	101.736	31
103.733	18	102.055	17	101.738	0
103.735	0	102.057	9	101.74	0
103.754	0	102.059	33	101.743	4
103.756	19	102.061	15	101.745	70
103.758	0	102.063	0	101.747	13
103.763	0	102.065	25	101.749	31
103.765	29	102.067	0	101.751	23
103.767	0	102.075	0	101.753	0
103.79	0	102.078	55	101.755	21
103.792	49	102.079	22	101.757	37
103.794	38	102.082	8	101.759	0
103.796	0	102.084	0	101.763	0
103.804	0	102.088	0	101.765	49
103.806	16	102.09	55	101.767	12
103.808	8	102.092	57	101.769	32
103.811	0	102.094	31	101.772	0
103.813	19	102.096	0	101.776	0
103.815	0	102.098	38	101.778	11
103.856	0	102.1	9	101.78	76
103.859	52	102.102	0	101.782	70
103.861	10	102.104	81	101.784	22
103.863	0	102.106	41	101.786	21
103.919	0	102.109	0	101.788	33
103.921	10	102.119	0	101.79	77
103.923	23	102.121	44	101.792	54
103.925	0	102.123	62	101.794	50
103.934	0	102.125	48	101.796	21
103.936	19	102.127	0	101.798	89
103.938	0	102.129	26	101.8	40
103.946	0	102.131	0	101.802	12
103.948	60	102.133	35	101.805	0
103.95	60	102.135	72	101.807	31
103.952	0	102.138	20	101.809	6
103.963	0	102.139	23	101.811	0
103.965	19	102.142	29	101.813	0
103.967	0	102.144	0	101.815	44
103.969	5	102.146	20	101.817	23
103.971	22	102.148	51	101.819	47
103.973	0	102.15	9	101.821	39
103.982	0	102.152	0	101.823	0
103.984	37	102.162	0	101.825	11
103.986	6	102.164	38	101.827	60
103.988	0	102.166	10	101.829	13
104.007	0	102.168	0	101.831	29
104.009	2	102.171	29	101.833	23
104.011	28	102.173	57	101.835	26
104.013	0	102.175	16	101.838	28
104.015	0	102.177	19	101.84	75
104.017	21	102.179	0	101.842	45
104.019	0	102.181	0	101.844	0
104.028	0	102.183	35	101.854	0
104.03	46	102.185	93	101.856	9
104.032	29	102.187	0	101.858	55
104.034	73	102.191	0	101.86	9
104.036	92	102.193	8	101.862	0
104.038	10	102.195	43	101.864	9
104.04	0	102.198	9	101.867	32
104.055	0	102.2	0	101.869	6
104.057	7	102.202	0	101.871	0
104.059	14	102.204	48	101.873	17
104.061	0	102.206	35	101.875	9
104.065	0	102.208	2	101.877	22
104.067	15	102.21	6	101.879	62
104.069	13	102.212	18	101.881	90
104.072	0	102.214	0	101.883	67
104.076	0	102.218	0	101.885	6
104.078	8	102.22	88	101.887	57
104.08	12	102.222	53	101.889	53
104.082	0	102.224	0	101.891	16
104.088	0	102.241	0	101.893	61
104.09	18	102.243	57	101.895	37
104.092	11	102.245	70	101.897	42
104.094	13	102.247	104	101.9	0
104.097	81	102.249	24	101.904	0
104.099	0	102.251	0	101.906	87
104.126	0	102.255	0	101.908	29
104.128	9	102.258	7	101.91	34
104.13	40	102.26	21	101.912	56
104.132	7	102.262	39	101.914	54
104.134	16	102.264	46	101.916	40
104.136	0	102.266	0	101.918	92
104.142	0	102.274	0	101.92	110
104.145	19	102.276	19	101.922	89
104.147	0	102.278	12	101.924	50
104.149	19	102.28	35	101.927	48
104.151	7	102.282	68	101.928	12
104.153	0	102.284	12	101.931	51
104.155	0	102.287	0	101.933	11
104.157	28	102.289	0	101.935	23
104.159	76	102.291	43	101.937	24
104.161	0	102.293	102	101.939	0
104.163	0	102.295	10	101.943	0
104.165	37	102.297	10	101.945	39
104.168	48	102.299	0	101.947	54
104.17	76	102.301	6	101.949	7
104.172	0	102.303	128	101.951	32
104.182	0	102.305	41	101.953	16
104.184	13	102.307	0	101.955	4
104.186	32	102.311	0	101.957	0
104.189	0	102.314	59	101.964	0
104.209	0	102.316	2	101.966	39
104.212	24	102.318	0	101.968	23
104.214	12	102.32	0	101.97	0
104.216	0	102.322	46	101.972	27
104.266	0	102.324	11	101.974	37
104.268	23	102.326	0	101.976	30
104.27	0	102.345	0	101.978	10
104.276	0	102.347	19	101.98	31
104.278	52	102.349	14	101.982	0
104.281	50	102.351	0	101.984	0
104.283	0	102.365	0	101.986	16
104.314	0	102.367	6	101.989	18
104.316	14	102.369	18	101.991	71
104.318	24	102.371	19	101.993	9
104.32	0	102.374	66	101.995	30
104.333	0	102.376	68	101.997	119
104.335	29	102.378	67	101.999	0
104.337	10	102.38	15	102.005	0
104.339	0	102.382	9	102.007	8
104.341	0	102.384	59	102.009	62
104.343	7	102.386	33	102.011	93
104.345	33	102.388	51	102.013	88
104.347	0	102.39	0	102.015	111
104.354	0	102.392	4	102.017	8
104.356	64	102.394	24	102.019	0
104.358	12	102.396	0	102.026	0
104.36	0	102.407	0	102.028	97
104.379	0	102.409	5	102.03	10
104.381	19	102.411	83	102.032	79
104.383	38	102.413	59	102.034	45
104.385	19	102.415	19	102.036	12
104.387	0	102.417	17	102.038	18
104.41	0	102.419	6	102.04	17
104.412	141	102.421	0	102.042	32
104.414	53	102.438	0	102.044	0
104.416	0	102.44	37	102.049	0
104.435	0	102.442	12	102.051	8
104.437	52	102.444	36	102.053	62
104.439	9	102.446	17	102.055	47
104.442	0	102.448	0	102.057	109
104.45	0	102.45	0	102.059	79
104.452	17	102.452	42	102.061	34
104.454	6	102.454	3	102.063	12
104.456	0	102.457	0	102.065	48
104.46	0	102.461	0	102.067	34
104.463	38	102.463	8	102.069	0
104.465	38	102.465	59	102.071	0
104.467	0	102.467	26	102.073	46
104.469	0	102.469	85	102.075	12
104.471	12	102.471	0	102.078	55
104.473	6	102.473	7	102.079	22
104.475	0	102.475	80	102.082	63
104.486	0	102.477	0	102.084	78
104.488	5	102.479	0	102.086	0
104.49	42	102.481	24	102.088	22
104.492	0	102.483	4	102.09	68
104.494	0	102.486	51	102.092	66
104.496	18	102.488	7	102.094	31
104.498	9	102.49	0	102.096	82
104.5	0	102.492	13	102.098	64
104.515	0	102.494	16	102.1	28
104.517	27	102.496	0	102.102	5
104.519	11	102.498	0	102.104	123
104.521	0	102.5	10	102.106	73
104.544	0	102.502	35	102.109	38
104.546	12	102.504	0	102.111	0
104.548	18	102.508	0	102.113	19
104.55	0	102.51	9	102.115	30
104.553	0	102.513	18	102.117	32
104.555	30	102.514	35	102.119	0
104.557	8	102.517	85	102.121	44
104.559	0	102.519	62	102.123	69
104.563	0	102.521	0	102.125	79
104.565	9	102.523	79	102.127	0
104.567	25	102.525	34	102.129	26
104.569	2	102.527	0	102.131	0
104.571	26	102.529	14	102.133	35
104.573	81	102.531	20	102.135	72
104.576	1	102.533	77	102.138	41
104.578	0	102.535	39	102.139	94
104.58	0	102.537	12	102.142	54
104.582	10	102.539	0	102.144	0
104.584	12	102.544	0	102.146	24
104.586	0	102.546	6	102.148	67
104.594	0	102.548	70	102.15	12
104.597	17	102.55	0	102.152	19
104.599	20	102.552	31	102.154	0
104.601	0	102.554	99	102.156	14
104.622	0	102.556	33	102.158	55
104.624	14	102.558	35	102.16	13
104.626	7	102.56	62	102.162	0
104.628	123	102.562	29	102.164	54
104.63	38	102.564	15	102.166	55
104.632	0	102.566	12	102.168	0
104.634	0	102.569	0	102.171	37
104.636	20	102.57	28	102.173	96
104.638	24	102.573	28	102.175	38
104.641	0	102.575	22	102.177	19
104.643	23	102.577	11	102.179	0
104.645	0	102.579	0	102.181	0
104.651	0	102.581	0	102.183	66
104.653	6	102.583	9	102.185	131
104.655	12	102.585	20	102.187	0
104.657	0	102.587	0	102.191	0
104.662	0	102.602	0	102.193	15
104.664	16	102.604	23	102.195	69
104.666	49	102.606	31	102.198	17
104.668	34	102.608	0	102.2	52
104.67	30	102.614	0	102.202	17
104.672	0	102.616	13	102.204	70
104.676	0	102.618	58	102.206	35
104.678	2	102.62	33	102.208	24
104.68	49	102.622	0	102.21	6
104.683	0	102.624	3	102.212	18
104.703	0	102.626	79	102.214	0
104.706	10	102.629	0	102.216	0
104.708	16	102.641	0	102.218	16
104.71	0	102.643	18	102.22	134
104.714	0	102.645	29	102.222	72
104.716	7	102.647	22	102.224	0
104.718	37	102.649	6	102.235	0
104.72	14	102.651	35	102.237	21
104.722	6	102.653	33	102.239	23
104.724	51	102.656	0	102.241	13
104.727	0	102.664	0	102.243	97
104.739	0	102.666	12	102.245	128
104.741	2	102.668	36	102.247	116
104.743	32	102.67	25	102.249	24
104.745	0	102.672	0	102.251	55
104.756	0	102.676	0	102.253	175
104.758	63	102.678	26	102.255	13
104.76	0	102.68	80	102.258	7
104.768	0	102.683	43	102.26	31
104.77	11	102.685	32	102.262	84
104.773	41	102.687	0	102.264	68
104.775	0	102.689	0	102.266	11
104.777	0	102.691	59	102.268	35
104.779	2	102.693	34	102.27	0
104.781	34	102.695	102	102.274	0
104.783	0	102.697	0	102.276	43
104.785	0	102.705	0	102.278	20
104.787	9	102.707	38	102.28	47
104.789	18	102.71	59	102.282	79
104.791	40	102.712	0	102.284	29
104.794	0	102.714	17	102.287	0
104.817	0	102.716	86	102.289	0
104.819	30	102.718	32	102.291	43
104.821	45	102.72	15	102.293	102
104.823	25	102.722	10	102.295	55
104.825	17	102.724	32	102.297	80
104.827	0	102.726	20	102.299	0
104.838	0	102.728	75	102.301	6
104.84	7	102.73	11	102.303	128
104.842	82	102.732	0	102.305	87
104.844	57	102.745	0	102.307	64
104.846	65	102.747	21	102.309	10
104.848	0	102.749	32	102.311	26
104.852	0	102.751	0	102.314	67
104.854	12	102.753	43	102.316	79
104.856	12	102.755	1	102.318	13
104.859	0	102.757	0	102.32	24
104.867	0	102.759	8	102.322	46
104.869	37	102.761	23	102.324	11
104.871	0	102.763	0	102.326	16
104.896	0	102.766	8	102.328	16
104.898	11	102.768	75	102.33	8
104.9	45	102.77	38	102.332	0
104.903	0	102.772	0	102.336	0
104.905	0	102.784	0	102.338	6
104.907	18	102.786	19	102.34	51
104.909	23	102.788	45	102.343	89
104.911	7	102.79	27	102.345	55
104.913	0	102.793	14	102.347	84
104.915	0	102.795	0	102.349	14
104.917	22	102.797	18	102.351	0
104.919	0	102.799	63	102.357	0
104.938	0	102.801	4	102.359	64
104.94	4	102.803	0	102.361	34
104.942	24	102.817	0	102.363	32
104.945	0	102.82	7	102.365	0
104.947	31	102.822	35	102.367	25
104.949	29	102.824	0	102.369	18
104.951	0	102.828	0	102.371	19
104.966	0	102.83	12	102.374	66
104.968	14	102.832	30	102.376	68
104.97	7	102.834	36	102.378	67
104.972	41	102.836	0	102.38	15
104.974	3	102.855	0	102.382	26
104.976	0	102.857	26	102.384	103
104.997	0	102.859	7	102.386	78
104.999	31	102.861	3	102.388	72
105.001	0	102.863	96	102.39	0
105.012	0	102.865	0	102.392	4
105.014	6	102.874	0	102.394	24
105.016	12	102.876	58	102.396	0
105.018	0	102.878	54	102.4	0
105.024	0	102.88	6	102.403	19
105.026	25	102.882	7	102.405	19
105.028	0	102.884	58	102.407	0
105.037	0	102.886	0	102.409	20
105.039	14	102.901	0	102.411	120
105.041	16	102.903	4	102.413	59
105.043	33	102.905	49	102.415	19
105.045	3	102.907	9	102.417	33
105.047	0	102.909	0	102.419	22
105.052	0	102.921	0	102.421	0
105.054	29	102.923	47	102.427	0
105.056	11	102.925	33	102.43	12
105.058	0	102.928	0	102.432	6
105.06	12	102.93	0	102.434	19
105.062	8	102.932	12	102.436	0
105.064	0	102.934	42	102.438	0
105.066	27	102.936	0	102.44	51
105.068	10	102.938	51	102.442	19
105.07	0	102.94	0	102.444	36
105.081	0	102.948	0	102.446	98
105.083	14	102.951	2	102.448	30
105.085	7	102.953	38	102.45	13
105.087	0	102.955	55	102.452	51
105.197	0	102.957	0	102.454	3
105.199	22	102.959	0	102.457	0
105.201	0	102.961	10	102.461	0
105.218	0	102.963	10	102.463	8
105.22	19	102.965	16	102.465	59
105.222	27	102.967	24	102.467	40
105.224	33	102.969	12	102.469	137
105.226	0	102.971	45	102.471	43
105.234	0	102.973	0	102.473	19
105.236	6	102.975	0	102.475	86
105.239	12	102.978	78	102.477	17
105.241	0	102.98	20	102.479	0
105.249	0	102.982	0	102.481	26
105.251	13	102.984	5	102.483	32
105.253	91	102.986	93	102.486	51
105.255	24	102.988	0	102.488	7
105.257	0	102.99	45	102.49	0
105.283	0	102.992	0	102.492	13
105.285	4	102.994	0	102.494	53
105.287	31	102.996	14	102.496	0
105.289	9	102.998	41	102.498	17
105.291	18	103	17	102.5	16
105.293	0	103.002	0	102.502	35
105.318	0	103.004	0	102.504	0
105.32	45	103.007	25	102.508	0
105.323	37	103.009	37	102.51	17
105.325	0	103.011	0	102.513	63
105.333	0	103.013	13	102.514	86
105.335	81	103.015	48	102.517	174
105.337	21	103.017	19	102.519	102
105.339	0	103.019	0	102.521	0
105.35	0	103.021	0	102.523	85
105.352	46	103.023	31	102.525	46
105.354	15	103.025	71	102.527	0
105.356	13	103.027	50	102.529	22
105.358	30	103.029	33	102.531	32
105.36	0	103.031	95	102.533	87
105.379	0	103.034	26	102.535	76
105.381	23	103.036	131	102.537	12
105.383	65	103.038	74	102.539	0
105.386	3	103.04	23	102.544	0
105.388	29	103.042	27	102.546	19
105.39	0	103.044	0	102.548	100
105.398	0	103.046	60	102.55	12
105.4	28	103.048	7	102.552	49
105.402	28	103.05	0	102.554	99
105.404	0	103.061	0	102.556	33
105.417	0	103.063	14	102.558	35
105.419	4	103.065	7	102.56	76
105.421	29	103.067	23	102.562	45
105.424	0	103.069	0	102.564	22
105.426	0	103.071	0	102.566	44
105.428	16	103.073	16	102.569	0
105.43	8	103.075	100	102.57	28
105.432	0	103.077	20	102.573	28
105.436	0	103.079	75	102.575	22
105.438	4	103.081	40	102.577	11
105.44	16	103.084	0	102.579	0
105.442	0	103.092	0	102.581	19
105.449	0	103.094	35	102.583	9
105.451	14	103.096	12	102.585	20
105.453	7	103.098	0	102.587	16
105.455	0	103.1	0	102.589	16
105.457	0	103.102	9	102.591	25
105.459	2	103.104	26	102.593	23
105.461	90	103.106	12	102.595	10
105.463	27	103.109	24	102.597	60
105.466	0	103.111	4	102.6	0
105.518	0	103.113	19	102.602	58
105.52	14	103.115	21	102.604	50
105.522	20	103.117	8	102.606	31
105.524	0	103.119	34	102.608	16
105.556	0	103.121	14	102.61	14
105.558	12	103.123	27	102.612	0
105.56	41	103.125	32	102.614	22
105.562	0	103.127	19	102.616	13
105.564	4	103.129	95	102.618	116
105.567	16	103.131	65	102.62	42
105.569	0	103.133	69	102.622	0
105.577	0	103.135	0	102.624	3
105.579	46	103.138	15	102.626	117
105.581	8	103.14	45	102.629	40
105.583	0	103.142	78	102.631	0
105.592	0	103.144	43	102.641	0
105.594	6	103.146	19	102.643	51
105.596	12	103.148	41	102.645	71
105.598	0	103.15	44	102.647	22
105.6	36	103.152	60	102.649	6
105.602	34	103.154	31	102.651	43
105.604	21	103.156	0	102.653	81
105.606	27	103.169	0	102.656	24
105.609	0	103.171	6	102.658	0
105.668	0	103.173	41	102.662	0
105.67	25	103.175	0	102.664	9
105.672	4	103.179	0	102.666	30
105.674	0	103.181	7	102.668	36
105.689	0	103.183	14	102.67	25
105.691	124	103.185	0	102.672	0
105.693	4	103.21	0	102.676	0
105.695	0	103.213	14	102.678	26
105.699	0	103.215	7	102.68	104
105.701	48	103.217	0	102.683	103
105.703	14	103.219	19	102.685	32
105.705	0	103.221	13	102.687	28
105.718	0	103.223	6	102.689	2
105.72	73	103.225	66	102.691	59
105.722	57	103.227	26	102.693	71
105.724	18	103.229	4	102.695	107
105.727	21	103.231	0	102.697	0
105.729	46	103.233	22	102.699	13
105.731	0	103.235	47	102.701	9
105.743	0	103.237	8	102.703	0
105.746	19	103.24	0	102.705	0
105.748	5	103.242	17	102.707	38
105.75	0	103.244	38	102.71	59
105.76	0	103.246	65	102.712	0
105.762	34	103.248	17	102.714	17
105.764	14	103.25	0	102.716	86
105.766	0	103.252	10	102.718	32
105.785	0	103.254	16	102.72	15
105.788	38	103.256	0	102.722	10
105.79	21	103.26	0	102.724	32
105.792	0	103.262	26	102.726	20
105.806	0	103.264	90	102.728	75
105.809	14	103.267	13	102.73	11
105.811	32	103.269	0	102.732	0
105.813	0	103.271	0	102.739	0
105.815	0	103.273	14	102.741	4
105.817	6	103.275	7	102.743	44
105.819	12	103.277	0	102.745	38
105.821	0	103.285	0	102.747	52
105.823	0	103.287	8	102.749	97
105.826	19	103.29	23	102.751	32
105.828	0	103.291	0	102.753	52
105.832	0	103.294	0	102.755	1
105.834	45	103.296	30	102.757	25
105.836	0	103.298	55	102.759	18
105.853	0	103.3	0	102.761	23
105.855	55	103.302	11	102.763	0
105.857	5	103.304	48	102.766	8
105.859	0	103.306	0	102.768	99
105.899	0	103.308	54	102.77	42
105.901	36	103.31	140	102.772	0
105.903	28	103.312	25	102.778	0
105.906	0	103.314	46	102.78	29
105.935	0	103.317	24	102.782	12
105.937	18	103.319	38	102.784	0
105.939	27	103.321	9	102.786	44
105.941	0	103.323	20	102.788	63
105.954	0	103.325	0	102.79	27
105.956	34	103.333	0	102.793	14
105.958	14	103.335	13	102.795	0
105.96	0	103.337	9	102.797	18
106.011	0	103.339	23	102.799	63
106.013	63	103.341	28	102.801	4
106.015	1	103.344	38	102.803	0
106.017	0	103.346	18	102.807	0
106.032	0	103.348	0	102.809	2
106.034	42	103.35	49	102.811	40
106.036	23	103.352	2	102.813	0
106.038	0	103.354	10	102.815	6
106.051	0	103.356	31	102.817	18
106.053	25	103.358	0	102.82	7
106.055	20	103.362	0	102.822	84
106.057	5	103.364	94	102.824	15
106.059	55	103.367	54	102.826	0
106.062	0	103.369	0	102.828	0
106.081	0	103.371	23	102.83	12
106.083	4	103.373	11	102.832	30
106.085	35	103.375	0	102.834	36
106.087	7	103.391	0	102.836	0
106.089	0	103.394	50	102.844	0
106.1	0	103.396	33	102.847	68
106.102	28	103.398	6	102.849	77
106.104	35	103.4	0	102.851	41
106.106	5	103.412	0	102.853	0
106.108	0	103.414	6	102.855	0
106.11	6	103.416	18	102.857	26
106.112	31	103.419	0	102.859	7
106.114	7	103.421	23	102.861	3
106.117	0	103.423	33	102.863	105
106.133	0	103.425	0	102.865	20
106.135	13	103.427	17	102.867	38
106.138	9	103.429	46	102.869	50
106.14	0	103.431	56	102.871	0
106.156	0	103.433	80	102.874	0
106.159	14	103.435	30	102.876	58
106.161	76	103.437	18	102.878	54
106.163	19	103.439	8	102.88	6
106.165	0	103.442	26	102.882	7
106.171	0	103.444	11	102.884	58
106.173	12	103.446	0	102.886	0
106.175	6	103.448	8	102.888	0
106.178	0	103.45	32	102.89	22
106.18	146	103.452	51	102.892	18
106.182	5	103.454	24	102.894	36
106.184	6	103.456	0	102.896	12
106.186	12	103.458	0	102.898	0
106.188	0	103.46	28	102.901	0
106.19	0	103.462	15	102.903	4
106.192	26	103.464	42	102.905	52
106.195	0	103.466	0	102.907	45
106.199	0	103.477	0	102.909	10
106.201	18	103.479	23	102.911	0
106.203	24	103.481	7	102.913	65
106.205	0	103.483	45	102.915	44
106.213	0	103.485	36	102.917	40
106.216	19	103.487	5	102.919	0
106.218	0	103.489	22	102.921	0
106.241	0	103.492	6	102.923	47
106.243	16	103.494	19	102.925	47
106.245	16	103.496	0	102.928	31
106.247	19	103.498	7	102.93	31
106.249	44	103.5	64	102.932	56
106.251	0	103.502	24	102.934	42
106.258	0	103.504	0	102.936	0
106.26	37	103.506	4	102.938	51
106.262	6	103.508	42	102.94	0
106.264	0	103.51	3	102.944	0
106.283	0	103.512	58	102.946	15
106.285	12	103.514	0	102.948	10
106.287	8	103.519	0	102.951	2
106.29	13	103.521	9	102.953	38
106.292	30	103.523	20	102.955	55
106.294	24	103.525	41	102.957	0
106.296	0	103.527	32	102.959	0
106.306	0	103.529	0	102.961	10
106.308	8	103.531	6	102.963	10
106.311	12	103.533	68	102.965	16
106.313	0	103.535	31	102.967	24
106.34	0	103.537	23	102.969	43
106.342	8	103.539	4	102.971	45
106.344	23	103.541	0	102.973	7
106.347	19	103.544	32	102.975	31
106.349	0	103.546	94	102.978	78
106.393	0	103.548	41	102.98	20
106.395	51	103.55	13	102.982	0
106.397	3	103.552	17	102.984	5
106.399	0	103.554	22	102.986	117
106.408	0	103.556	0	102.988	2
106.41	7	103.562	0	102.99	45
106.412	16	103.564	18	102.992	0
106.414	0	103.567	49	102.994	0
106.429	0	103.569	17	102.996	43
106.431	9	103.571	0	102.998	158
106.433	43	103.579	0	103	17
106.435	0	103.581	49	103.002	8
106.473	0	103.583	75	103.004	98
106.475	16	103.585	0	103.007	62
106.478	45	103.591	0	103.009	50
106.48	0	103.594	13	103.011	8
106.488	0	103.596	37	103.013	13
106.49	28	103.598	0	103.015	48
106.492	40	103.6	0	103.017	19
106.494	0	103.602	14	103.019	0
106.53	0	103.604	7	103.021	0
106.532	13	103.606	0	103.023	44
106.535	26	103.61	0	103.025	103
106.537	0	103.612	16	103.027	53
106.543	0	103.614	34	103.029	78
106.545	56	103.617	0	103.031	95
106.547	28	103.623	0	103.034	57
106.549	0	103.625	10	103.036	140
106.566	0	103.627	15	103.038	74
106.568	26	103.629	0	103.04	47
106.57	4	103.633	0	103.042	44
106.573	41	103.635	25	103.044	67
106.575	24	103.637	64	103.046	96
106.577	8	103.639	24	103.048	7
106.579	0	103.641	0	103.05	41
106.581	21	103.644	0	103.052	17
106.583	24	103.646	10	103.054	23
106.585	7	103.648	12	103.056	54
106.587	34	103.65	0	103.058	132
106.59	33	103.652	0	103.061	0
106.592	20	103.654	8	103.063	46
106.594	0	103.656	23	103.065	26
106.604	0	103.658	29	103.067	23
106.606	11	103.66	55	103.069	0
106.609	93	103.662	21	103.071	0
106.611	16	103.665	26	103.073	16
106.613	0	103.667	0	103.075	100
106.615	0	103.669	6	103.077	67
106.617	46	103.671	18	103.079	80
106.619	12	103.673	0	103.081	40
106.621	0	103.685	0	103.084	0
106.626	0	103.687	18	103.086	0
106.628	52	103.689	50	103.088	10
106.63	3	103.692	27	103.09	15
106.632	0	103.694	0	103.092	20
106.676	0	103.696	19	103.094	35
106.678	14	103.698	34	103.096	31
106.68	7	103.7	27	103.098	75
106.683	0	103.702	0	103.1	0
106.691	0	103.704	14	103.102	13
106.693	41	103.706	7	103.104	50
106.695	7	103.708	0	103.106	12
106.697	0	103.71	0	103.109	24
106.714	0	103.712	57	103.111	16
106.716	19	103.715	32	103.113	31
106.719	40	103.717	27	103.115	21
106.721	59	103.719	10	103.117	8
106.723	16	103.721	0	103.119	66
106.725	0	103.723	58	103.121	46
106.727	0	103.725	92	103.123	27
106.729	2	103.727	23	103.125	32
106.731	26	103.729	0	103.127	23
106.733	0	103.731	6	103.129	126
106.736	0	103.733	18	103.131	65
106.738	47	103.735	0	103.133	69
106.74	72	103.737	0	103.135	23
106.742	0	103.74	13	103.138	43
106.755	0	103.742	34	103.14	45
106.757	29	103.744	0	103.142	78
106.759	5	103.746	0	103.144	43
106.761	29	103.748	22	103.146	62
106.763	5	103.75	32	103.148	86
106.765	0	103.752	0	103.15	44
106.778	0	103.754	7	103.152	67
106.78	14	103.756	51	103.154	45
106.782	78	103.758	0	103.156	9
106.784	0	103.763	0	103.158	18
106.786	12	103.765	29	103.16	0
106.788	6	103.767	32	103.162	24
106.79	0	103.769	0	103.165	18
106.814	0	103.79	0	103.167	0
106.816	14	103.792	49	103.169	5
106.818	68	103.794	38	103.171	87
106.82	12	103.796	0	103.173	72
106.822	0	103.804	0	103.175	73
106.833	0	103.806	16	103.177	8
106.835	14	103.808	8	103.179	0
106.837	30	103.811	0	103.181	26
106.839	0	103.813	19	103.183	14
106.844	0	103.815	26	103.185	44
106.846	33	103.817	7	103.188	56
106.848	5	103.819	0	103.19	0
106.85	0	103.821	26	103.192	0
106.852	0	103.823	101	103.194	18
106.854	13	103.825	41	103.196	53
106.856	15	103.827	0	103.198	0
106.858	0	103.829	19	103.21	0
106.873	0	103.831	0	103.213	28
106.875	19	103.833	0	103.215	35
106.877	3	103.835	31	103.217	19
106.879	0	103.838	24	103.219	42
106.886	0	103.84	4	103.221	13
106.888	27	103.842	0	103.223	14
106.89	10	103.846	0	103.225	118
106.892	0	103.848	40	103.227	36
106.905	0	103.85	74	103.229	4
106.907	82	103.852	135	103.231	0
106.909	53	103.854	0	103.233	22
106.911	0	103.856	0	103.235	47
106.913	10	103.859	52	103.237	8
106.915	30	103.861	10	103.24	0
106.918	0	103.863	0	103.242	17
106.922	0	103.865	15	103.244	38
106.924	73	103.867	10	103.246	65
106.926	12	103.869	0	103.248	17
106.928	0	103.9	0	103.25	22
106.956	0	103.902	12	103.252	18
106.958	32	103.904	12	103.254	16
106.96	9	103.906	0	103.256	98
106.962	0	103.909	0	103.258	3
106.968	0	103.911	21	103.26	0
106.971	17	103.913	100	103.262	56
106.973	12	103.915	0	103.264	163
106.975	0	103.919	0	103.267	45
106.981	0	103.921	19	103.269	7
106.983	7	103.923	74	103.271	0
106.985	32	103.925	12	103.273	14
106.987	0	103.927	12	103.275	7
106.996	0	103.93	12	103.277	0
106.998	26	103.931	12	103.279	0
107	13	103.934	51	103.281	25
107.002	0	103.936	62	103.283	36
107.004	0	103.938	0	103.285	0
107.007	10	103.94	37	103.287	43
107.009	27	103.942	26	103.29	23
107.011	78	103.944	25	103.291	45
107.013	10	103.946	6	103.294	8
107.015	8	103.948	93	103.296	30
107.017	12	103.95	74	103.298	55
107.019	19	103.952	0	103.3	0
107.021	0	103.963	0	103.302	11
107.023	0	103.965	34	103.304	48
107.026	12	103.967	18	103.306	0
107.028	12	103.969	22	103.308	54
107.03	0	103.971	67	103.31	203
107.032	19	103.973	0	103.312	25
107.034	45	103.982	0	103.314	57
107.036	8	103.984	37	103.317	79
107.038	0	103.986	6	103.319	38
107.045	0	103.988	0	103.321	9
107.047	24	103.994	0	103.323	20
107.049	4	103.996	14	103.325	0
107.051	0	103.998	7	103.327	0
107.089	0	104.001	0	103.329	6
107.091	51	104.007	0	103.331	94
107.093	29	104.009	2	103.333	8
107.096	20	104.011	28	103.335	116
107.098	0	104.013	6	103.337	51
107.1	7	104.015	12	103.339	23
107.102	14	104.017	21	103.341	28
107.104	7	104.019	6	103.344	38
107.106	14	104.021	18	103.346	84
107.108	0	104.023	0	103.348	41
107.11	10	104.028	0	103.35	71
107.112	12	104.03	46	103.352	59
107.115	0	104.032	29	103.354	21
107.119	0	104.034	73	103.356	83
107.121	16	104.036	109	103.358	0
107.123	8	104.038	63	103.36	32
107.125	0	104.04	33	103.362	11
107.142	0	104.042	6	103.364	94
107.144	33	104.044	12	103.367	54
107.146	9	104.046	0	103.369	0
107.148	0	104.055	0	103.371	23
107.151	22	104.057	38	103.373	11
107.153	6	104.059	14	103.375	6
107.155	0	104.061	0	103.377	12
107.17	0	104.065	0	103.379	0
107.172	6	104.067	15	103.385	0
107.174	18	104.069	25	103.387	16
107.176	0	104.072	6	103.389	75
107.187	0	104.074	0	103.391	7
107.189	43	104.076	0	103.394	50
107.191	31	104.078	29	103.396	70
107.193	0	104.08	20	103.398	54
107.214	0	104.082	0	103.4	0
107.216	6	104.088	0	103.402	0
107.219	12	104.09	62	103.404	12
107.221	0	104.092	34	103.406	92
107.225	0	104.094	21	103.408	21
107.227	18	104.097	93	103.41	55
107.229	9	104.099	0	103.412	44
107.231	0	104.111	0	103.414	6
107.242	0	104.113	5	103.416	26
107.244	43	104.115	22	103.419	23
107.246	18	104.118	0	103.421	65
107.248	0	104.122	0	103.423	52
107.25	0	104.124	14	103.425	0
107.252	16	104.126	39	103.427	17
107.254	4	104.128	9	103.429	101
107.257	0	104.13	40	103.431	94
107.259	23	104.132	7	103.433	80
107.261	55	104.134	32	103.435	52
107.263	53	104.136	16	103.437	68
107.265	0	104.138	0	103.439	8
107.288	0	104.14	19	103.442	26
107.291	66	104.142	3	103.444	11
107.293	39	104.145	63	103.446	45
107.295	0	104.147	0	103.448	88
107.297	65	104.149	19	103.45	80
107.299	39	104.151	34	103.452	106
107.301	0	104.153	36	103.454	75
107.305	0	104.155	0	103.456	7
107.308	23	104.157	28	103.458	14
107.31	0	104.159	76	103.46	28
107.318	0	104.161	0	103.462	156
107.32	52	104.163	0	103.464	105
107.322	49	104.165	37	103.466	0
107.325	0	104.168	48	103.475	0
107.39	0	104.17	76	103.477	51
107.392	21	104.172	14	103.479	54
107.395	0	104.174	19	103.481	7
107.42	0	104.176	0	103.483	45
107.422	5	104.182	0	103.485	57
107.424	22	104.184	13	103.487	51
107.426	0	104.186	63	103.489	22
107.437	0	104.189	26	103.492	6
107.439	10	104.191	0	103.494	50
107.441	30	104.209	0	103.496	6
107.443	0	104.212	24	103.498	19
107.45	0	104.214	12	103.5	64
107.452	23	104.216	0	103.502	24
107.454	0	104.218	0	103.504	0
107.456	0	104.22	43	103.506	4
107.458	2	104.222	7	103.508	42
107.46	32	104.224	0	103.51	3
107.463	0	104.23	0	103.512	58
107.465	12	104.232	79	103.514	0
107.467	6	104.234	4	103.519	0
107.469	0	104.237	0	103.521	72
107.513	0	104.239	19	103.523	83
107.516	8	104.241	10	103.525	73
107.518	89	104.243	20	103.527	71
107.52	0	104.245	0	103.529	73
107.522	0	104.247	36	103.531	47
107.524	29	104.249	49	103.533	83
107.526	0	104.251	4	103.535	31
107.528	0	104.253	0	103.537	72
107.53	3	104.264	0	103.539	38
107.533	19	104.266	5	103.541	0
107.535	0	104.268	43	103.544	32
107.56	0	104.27	16	103.546	116
107.562	4	104.272	38	103.548	41
107.564	28	104.274	81	103.55	32
107.567	0	104.276	64	103.552	17
107.569	28	104.278	52	103.554	22
107.571	7	104.281	73	103.556	0
107.573	0	104.283	48	103.562	0
107.59	0	104.285	9	103.564	18
107.592	113	104.287	0	103.567	49
107.594	2	104.299	0	103.569	17
107.596	0	104.301	2	103.571	0
107.598	18	104.303	32	103.577	0
107.6	31	104.306	31	103.579	19
107.603	0	104.308	0	103.581	49
107.613	0	104.31	21	103.583	75
107.615	37	104.312	0	103.585	0
107.618	33	104.314	30	103.587	14
107.62	0	104.316	14	103.589	7
107.622	30	104.318	50	103.591	9
107.624	17	104.32	0	103.594	31
107.626	0	104.322	0	103.596	66
107.628	21	104.325	16	103.598	10
107.63	18	104.326	75	103.6	8
107.632	92	104.329	0	103.602	52
107.635	33	104.333	0	103.604	33
107.637	0	104.335	29	103.606	56
107.645	0	104.337	17	103.608	17
107.647	24	104.339	14	103.61	39
107.649	24	104.341	0	103.612	34
107.651	0	104.343	7	103.614	57
107.66	0	104.345	33	103.617	0
107.662	32	104.347	4	103.619	16
107.664	89	104.35	37	103.621	22
107.666	15	104.352	14	103.623	35
107.668	12	104.354	12	103.625	16
107.671	0	104.356	70	103.627	54
107.709	0	104.358	12	103.629	0
107.711	65	104.36	0	103.631	23
107.713	16	104.362	24	103.633	34
107.715	0	104.364	24	103.635	60
107.717	43	104.366	0	103.637	70
107.719	16	104.368	14	103.639	24
107.722	22	104.371	7	103.641	0
107.724	0	104.373	0	103.644	0
107.739	0	104.375	0	103.646	10
107.741	24	104.377	23	103.648	12
107.743	22	104.379	26	103.65	0
107.745	0	104.381	19	103.652	6
107.802	0	104.383	51	103.654	25
107.805	16	104.385	28	103.656	23
107.807	23	104.387	35	103.658	43
107.809	0	104.389	12	103.66	62
107.815	0	104.391	0	103.662	21
107.817	65	104.396	0	103.665	26
107.82	1	104.398	24	103.667	19
107.822	0	104.4	37	103.669	6
107.832	0	104.402	13	103.671	18
107.834	15	104.404	0	103.673	0
107.837	10	104.406	9	103.675	69
107.839	0	104.408	18	103.677	25
107.862	0	104.41	54	103.679	14
107.864	21	104.412	168	103.681	38
107.866	0	104.414	53	103.683	32
107.875	0	104.416	0	103.685	4
107.877	6	104.419	111	103.687	26
107.879	43	104.421	63	103.689	87
107.881	0	104.423	0	103.692	33
107.892	0	104.433	0	103.694	0
107.894	25	104.435	19	103.696	19
107.896	0	104.437	85	103.698	34
107.898	0	104.439	9	103.7	27
107.9	19	104.442	37	103.702	0
107.902	0	104.444	26	103.704	43
107.911	0	104.446	0	103.706	19
107.913	6	104.448	23	103.708	0
107.915	24	104.45	0	103.71	0
107.917	0	104.452	17	103.712	57
107.934	0	104.454	6	103.715	44
107.936	44	104.456	0	103.717	71
107.939	26	104.46	0	103.719	36
107.941	0	104.463	38	103.721	0
107.966	0	104.465	38	103.723	58
107.968	14	104.467	3	103.725	143
107.971	7	104.469	79	103.727	68
107.973	0	104.471	30	103.729	0
107.992	0	104.473	6	103.731	6
107.994	19	104.475	14	103.733	18
107.996	5	104.477	32	103.735	0
107.998	0	104.479	8	103.737	37
108.015	0	104.481	0	103.74	29
108.017	19	104.486	0	103.742	34
108.019	19	104.488	30	103.744	52
108.022	0	104.49	42	103.746	102
108.037	0	104.492	0	103.748	30
108.039	28	104.494	0	103.75	37
108.041	28	104.496	18	103.752	73
108.043	0	104.498	9	103.754	30
108.058	0	104.5	0	103.756	65
108.06	9	104.502	0	103.758	23
108.062	40	104.504	74	103.76	0
108.064	0	104.507	35	103.763	4
108.079	0	104.509	12	103.765	91
108.081	4	104.511	6	103.767	49
108.083	42	104.513	0	103.769	12
108.085	0	104.515	15	103.771	0
108.117	0	104.517	40	103.781	0
108.12	46	104.519	18	103.783	24
108.122	31	104.521	36	103.785	19
108.124	0	104.523	0	103.787	46
108.139	0	104.528	0	103.79	35
108.141	23	104.53	16	103.792	86
108.143	38	104.532	4	103.794	46
108.145	24	104.534	0	103.796	20
108.147	6	104.538	0	103.798	73
108.149	12	104.54	4	103.8	0
108.151	3	104.542	16	103.804	0
108.154	19	104.544	0	103.806	16
108.156	0	104.546	22	103.808	8
108.162	0	104.548	51	103.811	19
108.164	48	104.55	50	103.813	19
108.166	10	104.553	0	103.815	26
108.168	0	104.555	30	103.817	51
108.179	0	104.557	26	103.819	39
108.181	51	104.559	66	103.821	70
108.183	0	104.561	23	103.823	111
108.201	0	104.563	0	103.825	41
108.203	58	104.565	9	103.827	7
108.205	9	104.567	50	103.829	39
108.207	0	104.569	2	103.831	12
108.211	0	104.571	26	103.833	0
108.213	29	104.573	96	103.835	34
108.215	5	104.576	31	103.838	65
108.218	0	104.578	0	103.84	4
108.232	0	104.58	0	103.842	0
108.235	41	104.582	33	103.844	0
108.237	39	104.584	12	103.846	39
108.239	0	104.586	34	103.848	52
108.241	0	104.588	82	103.85	96
108.243	7	104.59	0	103.852	135
108.245	14	104.594	0	103.854	0
108.247	0	104.597	17	103.856	19
108.254	0	104.599	20	103.859	64
108.256	19	104.601	0	103.861	44
108.258	12	104.609	0	103.863	47
108.26	0	104.611	26	103.865	107
108.262	19	104.613	7	103.867	17
108.264	44	104.615	37	103.869	14
108.266	0	104.618	70	103.871	43
108.299	0	104.62	72	103.873	0
108.301	6	104.622	10	103.879	0
108.303	59	104.624	14	103.881	3
108.305	0	104.626	7	103.883	39
108.331	0	104.628	123	103.886	19
108.333	26	104.63	38	103.888	35
108.335	13	104.632	0	103.89	0
108.337	0	104.634	0	103.9	0
108.36	0	104.636	20	103.902	12
108.362	19	104.638	24	103.904	39
108.365	0	104.641	44	103.906	74
108.367	0	104.643	26	103.909	0
108.369	32	104.645	0	103.911	21
108.371	3	104.651	0	103.913	100
108.373	0	104.653	6	103.915	0
108.377	0	104.655	12	103.919	0
108.379	4	104.657	0	103.921	19
108.382	36	104.659	0	103.923	74
108.384	0	104.662	29	103.925	69
108.39	0	104.664	16	103.927	95
108.392	23	104.666	49	103.93	32
108.394	18	104.668	60	103.931	12
108.397	0	104.67	37	103.934	75
108.414	0	104.672	0	103.936	102
108.416	12	104.676	0	103.938	76
108.418	34	104.678	44	103.94	147
108.42	18	104.68	110	103.942	55
108.422	0	104.683	0	103.944	25
108.424	0	104.689	0	103.946	12
108.426	4	104.691	6	103.948	111
108.428	35	104.693	12	103.95	119
108.431	0	104.695	0	103.952	51
108.433	26	104.699	0	103.954	16
108.435	0	104.701	6	103.957	36
108.441	0	104.703	79	103.959	4
108.444	8	104.706	10	103.961	0
108.446	103	104.708	16	103.963	0
108.448	16	104.71	0	103.965	34
108.45	0	104.714	0	103.967	18
108.454	0	104.716	7	103.969	22
108.456	49	104.718	37	103.971	75
108.458	67	104.72	14	103.973	57
108.46	0	104.722	6	103.975	23
108.467	0	104.724	51	103.978	28
108.469	4	104.727	55	103.98	0
108.471	36	104.729	1	103.982	0
108.473	0	104.731	0	103.984	37
108.535	0	104.735	0	103.986	53
108.537	25	104.737	10	103.988	7
108.54	17	104.739	60	103.99	0
108.542	0	104.741	37	103.994	0
108.559	0	104.743	40	103.996	14
108.561	26	104.745	0	103.998	7
108.563	0	104.752	0	104.001	0
108.567	0	104.754	24	104.003	0
108.569	41	104.756	25	104.005	8
108.572	65	104.758	81	104.007	25
108.574	0	104.76	3	104.009	2
108.576	0	104.762	41	104.011	28
108.578	48	104.764	0	104.013	6
108.58	8	104.768	0	104.015	55
108.582	0	104.77	11	104.017	47
108.584	29	104.773	76	104.019	6
108.586	5	104.775	20	104.021	24
108.589	0	104.777	4	104.023	12
108.614	0	104.779	39	104.025	0
108.616	39	104.781	46	104.028	66
108.618	6	104.783	0	104.03	72
108.621	0	104.785	0	104.032	29
108.623	16	104.787	9	104.034	73
108.625	14	104.789	18	104.036	109
108.627	0	104.791	40	104.038	63
108.629	51	104.794	0	104.04	33
108.631	34	104.796	0	104.042	6
108.633	8	104.798	14	104.044	17
108.635	72	104.8	30	104.046	39
108.638	0	104.802	149	104.049	0
108.661	0	104.804	91	104.055	0
108.663	26	104.806	0	104.057	38
108.665	0	104.808	19	104.059	14
108.685	0	104.81	0	104.061	21
108.687	33	104.817	0	104.063	14
108.689	31	104.819	30	104.065	13
108.691	0	104.821	45	104.067	85
108.697	0	104.823	25	104.069	72
108.7	23	104.825	17	104.072	10
108.702	0	104.827	0	104.074	0
108.717	0	104.838	0	104.076	0
108.719	10	104.84	59	104.078	83
108.721	12	104.842	120	104.08	60
108.723	0	104.844	121	104.082	0
108.732	0	104.846	116	104.084	102
108.734	21	104.848	10	104.086	44
108.736	3	104.85	6	104.088	0
108.738	0	104.852	30	104.09	62
108.74	22	104.854	28	104.092	34
108.742	0	104.856	12	104.094	21
108.746	0	104.859	0	104.097	93
108.749	10	104.861	0	104.099	0
108.751	20	104.863	10	104.111	0
108.753	0	104.865	44	104.113	5
108.755	6	104.867	0	104.115	70
108.757	18	104.869	37	104.118	16
108.759	0	104.871	0	104.12	0
108.781	0	104.875	0	104.122	0
108.783	14	104.877	67	104.124	14
108.785	7	104.879	24	104.126	79
108.787	0	104.882	0	104.128	17
108.789	10	104.896	0	104.13	78
108.791	32	104.898	11	104.132	62
108.793	0	104.9	45	104.134	46
108.796	0	104.903	0	104.136	23
108.798	25	104.905	0	104.138	0
108.8	20	104.907	18	104.14	19
108.802	0	104.909	23	104.142	3
108.806	0	104.911	17	104.145	63
108.808	14	104.913	16	104.147	0
108.811	16	104.915	0	104.149	19
108.813	0	104.917	22	104.151	34
108.819	0	104.919	0	104.153	36
108.821	23	104.921	19	104.155	0
108.823	16	104.924	0	104.157	40
108.826	0	104.936	0	104.159	95
108.832	0	104.938	16	104.161	41
108.834	22	104.94	22	104.163	6
108.836	0	104.942	30	104.165	65
108.858	0	104.945	0	104.168	48
108.86	19	104.947	50	104.17	76
108.862	0	104.949	41	104.172	14
108.866	0	104.951	0	104.174	44
108.868	23	104.953	0	104.176	10
108.87	21	104.955	7	104.178	0
108.873	0	104.957	32	104.182	0
108.881	0	104.959	0	104.184	13
108.883	18	104.961	0	104.186	100
108.885	54	104.963	49	104.189	38
108.888	0	104.966	10	104.191	22
108.89	31	104.968	14	104.193	6
108.892	9	104.97	7	104.195	0
108.894	0	104.972	41	104.197	0
108.95	0	104.974	3	104.199	94
108.952	21	104.976	0	104.201	37
108.954	0	104.98	0	104.203	0
108.958	0	104.982	43	104.205	0
108.96	37	104.984	34	104.207	20
108.962	15	104.987	19	104.209	100
108.965	18	104.989	0	104.212	63
108.967	15	104.997	0	104.214	23
108.969	43	104.999	31	104.216	42
108.971	0	105.001	0	104.218	33
108.98	0	105.012	0	104.22	43
108.982	15	105.014	6	104.222	7
108.984	71	105.016	12	104.224	13
108.986	0	105.018	0	104.226	42
109.035	0	105.024	0	104.228	0
109.037	88	105.026	31	104.23	0
109.039	0	105.028	16	104.232	108
109.08	0	105.031	29	104.234	44
109.082	2	105.033	78	104.237	37
109.084	26	105.035	39	104.239	24
109.086	0	105.037	0	104.241	10
109.088	16	105.039	14	104.243	38
109.091	14	105.041	16	104.245	0
109.093	0	105.043	33	104.247	36
109.121	0	105.045	3	104.249	49
109.123	12	105.047	0	104.251	4
109.125	6	105.052	0	104.253	0
109.127	0	105.054	66	104.264	0
109.136	0	105.056	60	104.266	5
109.138	22	105.058	50	104.268	43
109.14	0	105.06	24	104.27	29
109.144	0	105.062	8	104.272	86
109.146	3	105.064	0	104.274	81
109.148	21	105.066	27	104.276	64
109.151	0	105.068	10	104.278	52
109.157	0	105.07	0	104.281	73
109.159	41	105.075	0	104.283	54
109.161	23	105.077	53	104.285	27
109.163	20	105.079	10	104.287	0
109.166	0	105.081	0	104.299	0
109.172	0	105.083	14	104.301	19
109.174	8	105.085	7	104.303	59
109.176	12	105.087	0	104.306	31
109.178	0	105.104	0	104.308	0
109.18	19	105.106	19	104.31	21
109.183	5	105.108	14	104.312	0
109.185	0	105.11	0	104.314	30
109.187	0	105.112	0	104.316	14
109.189	6	105.115	26	104.318	50
109.191	35	105.117	41	104.32	0
109.193	0	105.119	19	104.322	0
109.195	5	105.121	0	104.325	52
109.198	21	105.142	0	104.326	116
109.2	0	105.144	12	104.329	6
109.217	0	105.146	41	104.331	18
109.219	22	105.148	0	104.333	0
109.221	0	105.15	0	104.335	29
109.247	0	105.152	2	104.337	17
109.249	19	105.154	52	104.339	14
109.251	0	105.157	24	104.341	0
109.258	0	105.159	0	104.343	7
109.26	23	105.161	121	104.345	33
109.262	4	105.163	32	104.347	4
109.264	0	105.165	66	104.35	37
109.266	0	105.167	9	104.352	14
109.268	6	105.169	0	104.354	12
109.27	18	105.171	27	104.356	70
109.273	0	105.173	6	104.358	15
109.285	0	105.175	0	104.36	58
109.288	23	105.197	0	104.362	41
109.29	0	105.199	22	104.364	24
109.294	0	105.201	0	104.366	35
109.296	43	105.211	0	104.368	14
109.298	3	105.213	4	104.371	7
109.3	0	105.215	24	104.373	0
109.317	0	105.218	0	104.375	39
109.32	24	105.22	65	104.377	45
109.322	12	105.222	27	104.379	89
[truncated: 142,230 more rows]
